1 **Epigenetic analyses of planarian stem cells demonstrate conservation of**  
2 **bivalent histone modifications in animal stem cells.**

3

4 Anish Dattani\*<sup>1</sup>, Damian Kao\*<sup>1</sup>, Yuliana Mihaylova<sup>1</sup>, Prasad Abnave<sup>1</sup>, Samantha  
5 Hughes<sup>1</sup>, Alvina Lai<sup>1</sup>, Sounak Sahu<sup>1</sup> and Aziz Aboobaker<sup>1\*\*</sup>

6 **1.** Department of Zoology, Tinbergen Building, South Parks Road, Oxford, OX13PS,

7 UK

8 \* authors contributed equally

9 \*\* corresponding author: [aziz.aboobaker@zoo.ox.ac.uk](mailto:aziz.aboobaker@zoo.ox.ac.uk)

10

11 **Abstract**

12

13 Planarian flatworms have an indefinite capacity to regenerate missing or damaged  
14 body parts owing to a population of pluripotent adult stem cells called neoblasts  
15 (NBs). Currently, little is known about the importance of the epigenetic status of NBs  
16 and how histone modifications regulate homeostasis and cellular differentiation. We  
17 have developed an improved and optimized ChIP-seq protocol for NBs in *Schmidtea*  
18 *mediterranea* and have generated genome-wide profiles for the active marks  
19 H3K4me3 and H3K36me3, and suppressive marks H3K4me1 and H3K27me3. The  
20 genome-wide profiles of these marks were found to correlate well with NB gene  
21 expression profiles. We found that genes with little transcriptional activity in the NB  
22 compartment but which switch on in post-mitotic progeny during differentiation are  
23 bivalent, being marked by both H3K4me3 and H3K27me3 at promoter regions. In  
24 further support of this hypothesis bivalent genes also have a high level of paused  
25 RNA Polymerase II at the promoter-proximal region. Overall, this study confirms that  
26 epigenetic control is important for the maintenance of a NB transcriptional program  
27 and makes a case for bivalent promoters as a conserved feature of animal stem cells  
28 and not a vertebrate specific innovation. By establishing a robust ChIP-seq protocol  
29 and analysis methodology, we further promote planarians as a promising model  
30 system to investigate histone modification mediated regulation of stem cell function  
31 and differentiation.

32

33

34

35

36 **Introduction**

37

38 The promoters of developmental genes in mammalian embryonic stem cells (ESCs)  
39 are frequently marked with both the silencing H3K27me3 mark and active H3K4me3  
40 marks. It has been proposed that this ‘bivalent’ state precedes resolution into full  
41 transcriptional activation or repression depending on ultimate cell type commitment  
42 (Bernstein et al. 2006; Voigt et al. 2013; Harikumar and Meshorer 2015). The  
43 advantage is that bivalency represents a poised or transcription-ready state,  
44 whereby a developmental gene is silenced in ESCs, but can be readily rendered  
45 active during differentiation to a defined lineage. Evidence for this comes from the  
46 finding that 51% of bivalent promoters in ESCs are bound by paused polymerase  
47 (RNAPII-Ser5P), compared with 8% of non-bivalent promoters (Lesch and Page  
48 2014; Brookes et al. 2012); demonstrating a strong but not complete association.  
49 Bivalency may also protect promoters against less reversible suppressive  
50 mechanisms, such as DNA methylation (Lesch and Page 2014). Bivalent chromatin  
51 has also been discovered in male and female germ cells at many of the gene  
52 promoters that regulate somatic development, and may underpin the gametes’ ability  
53 to generate a zygote capable of producing all cellular lineages (Yamaguchi et al.  
54 2013; Cui et al. 2009; Hattori et al. 2013; Sachs et al. 2013; Lesch et al. 2013; Lesch  
55 and Page 2014).

56

57 It remains unclear whether the poised bivalent promoters of developmental genes  
58 are an epigenetic signature of vertebrates or arose earlier in the ancestor of all  
59 animals. Recently, the orthologs of bivalent genes that sit at the top of transcriptional  
60 hierarchies in mammalian development, were also found to be poised in chicken

61 male germ cells (Lesch et al. 2016). Sequential ChIP has also established  
62 H3K4me3/H3K27me3 co-occupancy of promoters in zebrafish blastomeres  
63 (Vastenhouw et al. 2010). Conversely, comparatively few bivalent domains were  
64 identified in *Xenopus* embryos undergoing the midblastula transition (Akkers et al.  
65 2009). *Xenopus* genes which appear to have signals for both H3K4me3 and  
66 H3K27me3 originate from cells in distinct areas of the embryo, and as such the  
67 observed bivalency can be explained by cellular heterogeneity (Akkers et al. 2009).

68

69 Given that bivalency correlates with pluripotency in ESCs, planarian pluripotent adult  
70 stem cells or neoblasts (NBs) represent one possible scenario where poised  
71 promoters could have an important role in invertebrates, if this regulatory feature is  
72 conserved. Planarian NBs are a population of adult dividing cells that collectively  
73 produce all differentiated cells during homeostatic turnover and regeneration  
74 (Aboobaker 2011; Rink 2013). Several RNA-binding proteins, such as *piwi* and *vasa*,  
75 typically associated with nuage of germ cells are also expressed in planarian NBs  
76 where they function in the maintenance of pluripotency (Reddien et al. 2005;  
77 Palakodeti et al. 2008; Solana 2013; Shibata et al. 2016; Lai and Aboobaker 2018).  
78 Moreover, the ability of NBs to differentiate upon demand must also require well-  
79 regulated transcriptional and epigenetic processes, and poised, bivalent promoters  
80 may constitute an effective way of coordinating the differentiation of these stem cells.

81

82 Here we develop an optimized ChIP-seq methodology for planarian NBs and  
83 combine this with informatics approaches to establish robust approaches for  
84 studying histone modifications at transcriptional starts sites (TSSs). This enabled us  
85 to identify genes with inactive/low expression in the NB population, but with greatly

86 increased expression in post-mitotic NB progeny that are actively differentiating, with  
87 bivalent promoters in planarian NBs by combining transcriptomic and epigenetic  
88 analyses. Our findings indicate that bivalent promoters in pluripotent stem cells are  
89 not just a facet of vertebrates, but may have a role in regulating pluripotency in  
90 embryonic and adult stem cells across animals.

91

## 92 **Results**

93

### 94 **Genome-wide annotation of transcribed loci in asexual *Schmidtea*** 95 ***mediterranea* genome and categorization by proportional expression in FACS** 96 **populations**

97

98 We sought to produce an annotation of all transcribed loci on the asexual *Schmidtea*  
99 *mediterranea* genome (SmedAsxl v1.1) utilising both *de novo* assembled  
100 transcriptomes and 164 independent RNA-seq datasets covering RNAi knockdown-,  
101 regenerating-, whole worm-, and cell compartment-specific datasets (**Figure 1A,**  
102 **Supplementary File 1**). The inclusion of these diverse datasets was to improve the  
103 overall representation of the genome, and is useful for discovering potential non-  
104 coding RNAs and protein-coding genes expressed at low levels, both of which may  
105 not have been fully covered by individual studies limited by read number, or reliant  
106 on homology based annotation processes such as MAKER (Cantarel et al. 2008).

107

108 Our new expression-based annotation identified 38,711 expressed loci, 21,772 of  
109 which are predicted to be coding (**Figure 1A**). Moreover, compared to the current  
110 available annotation of the *Schmidtea mediterranea* asexual genome (Smed GD 2.0)

111 (Robb et al. 2008), our annotation discovered 10,210 new potential protein coding  
112 loci that are expressed at similar overall levels to previously annotated protein coding  
113 genes. A total of 6,300 genes from the existing MAKER homology based annotation  
114 were not present in our expression driven annotation. Further analysis of these  
115 MAKER-specific genes shows that they generally have no or very little potential  
116 expression within the 164 RNA-seq libraries utilised for our annotation  
117 **(Supplementary Figure 1)**.

118

119 In the absence of transgenic approaches and antibodies for confirmed cell lineage  
120 markers, Fluorescence Activated Cell Sorting (FACS) gating cell populations stained  
121 with Hoechst and calcein is the best available tool for isolating NBs, progeny, and  
122 differentiated cells (Hayashi et al. 2006; Romero et al. 2012). FACS allows for two  
123 irradiation sensitive compartments to be discerned: the 'X1' gate representative of  
124 S/G2/M-phase NBs with >2C DNA content; and the 'X2' gate representative of G1  
125 phase NBs and post-mitotic progeny with 2C DNA content. The third FACS  
126 population, 'Xins', represents an irradiation-insensitive population with a higher  
127 cytoplasmic to nuclear ratio (**Figure 1B and 1C**). These cell compartments are  
128 heterogeneous, with subpopulations of NBs expressing epidermal, gut and other  
129 lineage-specific markers present within the X1 population (Scimone et al. 2014;  
130 Wurtzel et al. 2015; Van Wolfswinkel et al. 2014), and the X2 compartment  
131 consisting of an amalgam of G1 NBs and lineage-committed post-mitotic progeny  
132 (Baguñá and Romero 1981; Hayashi et al. 2006; Zhu et al. 2015; Molinaro and  
133 Pearson 2016).

134

135 We used the publicly available RNA-seq datasets for these three different FACS  
136 populations in order to compare the expression of our annotated loci in these three  
137 distinct compartments (Önal et al. 2012; Labbé et al. 2012; Van Wolfswinkel et al.  
138 2014; Zhu et al. 2015; Duncan et al. 2015). We first looked at the normalized TPM  
139 expression levels for annotated loci in our annotated genome in the FACS population  
140 datasets originating from four different planarian labs (**Supplementary Figure 2**).  
141 This revealed a rough congruence between different FACS populations from  
142 different labs (**Supplementary Figure 3A**).

143

144 We transformed absolute TPM expression values into proportional values for each  
145 FACS compartment in each of the datasets (**Figure 1D**; **Supplementary Figure**  
146 **3B**). These proportional values were then averaged across datasets, to produce a  
147 final set of X1:X2:Xins proportions for 27,206 loci (18,010 of which are predicted to  
148 be protein-coding) that had at least 10 reads mapped in at least one FACS RNA-seq  
149 library.

150

151 We were now able to sort all annotated genes according to whether their  
152 predominant expression (i.e. => 50% expression) is in X1 (S/G2/M-phase NBs), X2  
153 (NBs and stem cell progeny) or Xins (differentiated cells) (**Figure 1E**). We confirmed  
154 this analysis by Gene Ontology (GO) analyses and verification of the proportional  
155 expression profiles for known genes previously described as being enriched in X1,  
156 X2 or Xins (**Supplementary Figure 4**) (Solana et al. 2012; Önal et al. 2012; Labbé  
157 et al. 2012). We also re-analysed FACS single-cell RNA-seq datasets in the context  
158 of our genome annotation, and visualisation of the data by breakdown into our  
159 defined FACS expression categories was entirely consistent with this data

160 **(Supplementary Figure 5)**. In particular we note that those genes with the highest  
161 proportion of expression the X2 compartment are indicative of genes expressed in  
162 post-mitotic undifferentiated NB progeny, with only very little expression in NBs  
163 themselves **(Supplementary Figure 5)**.

164

165 Together these analyses provide a set of annotations and expression values that are  
166 directly related to the genome assembly, allowing integration of ChIP-seq data to  
167 investigate correlations between epigenetic marks and gene expression in the  
168 different planarians cell FACS compartments.

169

170 **An optimized ChIP-seq protocol reveals H3K4me3 and H3K36me3 levels**  
171 **correlate with gene expression in planarian NBs**

172

173 Research into the epigenetic mechanisms governing stem cell pluripotency in  
174 planarian NBs is still in its infancy (Dattani et al. 2018). Previous work has uncovered  
175 a lack of endogenous DNA methylation in the *Schmidtea mediterranea* genome, and  
176 characterized loss of function phenotypes for members of the NURD complex  
177 (Scimone et al. 2010; Jaber-Hijazi et al. 2013; Vásquez-Doorman and Petersen  
178 2016), COMPASS and COMPASS-like families (Hubert et al. 2013; Duncan et al.  
179 2015; Mihaylova et al. 2017) The first study to utilize ChIP-seq in planarians  
180 documented the effects of *mll1/2* and *set1* RNAi with respect to the activation mark  
181 H3K4me3 (Duncan et al. 2015). However, we revisited this data and noted that the  
182 total number of ChIP-seq reads from -1 million X1 sorted NBs was comparatively low  
183 in comparison to those from *Drosophila melanogaster* S2 'carrier' cells.

184



185 We developed an optimized ChIP-seq protocol for FACS sorted X1 NBs without the  
186 addition of excess ‘carrier’ cells. Instead, a -3% *Drosophila* ‘S2’ spike-in was added  
187 to our chromatin before immunoprecipitations (IP) simply as a method to normalize  
188 any technical differences in IPs across our replicate libraries (Orlando et al. 2014).  
189 We were able to generate high quality uniquely mapped reads to our annotated  
190 *Schmidtea mediterranea* genome using only 150-200,000 X1 cells per IP – 5 to 7  
191 times less material than the previously established planarian protocol (Duncan et al.  
192 2015) . With our protocol, *Drosophila* ‘spike-in’ reads accounted for an average of  
193 27% of X1 H3K4me3 libraries compared to an average of 87% in the previous  
194 study’s X1 H3K4me3 libraries. Moreover, *Drosophila* ‘spike-in’ reads accounted for  
195 9% of our X1 H3K36me3 libraries compared with 99% of the single X1 H3K36me3  
196 replicate included in a previous study (Duncan et al. 2015) (**Supplementary Figure**  
197 **6**).

198

199 We tested the robustness of our ChIP-seq protocol with reference to both H3K4me3  
200 and H3K36me3 – epigenetic marks that are known to positively correlate with gene  
201 expression in other model systems. H3K4me3 is laid down by the trithorax group  
202 (trxG) complexes containing SET or MLL enzymes at active promoters near TSSs  
203 (Bledau et al. 2014; Denissov et al. 2014; Sirén et al. 2014; Hu et al. 2013).  
204 H3K36me3 is a mark of transcriptional elongation, and is deposited on histones as  
205 they are displaced by RNA polymerase II and as such this modification is enriched  
206 towards the 3’ end of genes (Wagner and Carpenter 2012; Li et al. 2002).  
207 H3K36me3 is hypothesized to prevent spurious transcriptional initiation at cryptic  
208 promoter-like sequences within exons and, in yeast, this is achieved by the

209 recruitment of histone deacetylase complexes (HDAC) that erases elongation-  
210 associated acetylation (Carrozza et al. 2005; Joshi and Struhl 2005).

211

212 As predicted, ChIP-seq of H3K4me3 in X1 NBs revealed a high average peak  
213 around the TSSs of genes characterized as being X1 enriched (**Figure 2A**).

214 Conversely, we observed comparatively lower H3K4me3 deposition at the TSSs of  
215 Xins enriched genes not expressed or expressed only at very low levels in X1 cells.

216 Intermediate levels of H3K4me3 in the X2 compartment are consistent with this  
217 FACS population being a mixture of NBs and post-mitotic progeny. Indeed, genes

218 with the highest proportion of X2 expression (i.e. 'high ranking X2 genes') indicative  
219 of expression in post-mitotic progeny but not NBs had lower levels of H3K4me3 in

220 X1 cells compared with low ranking X2 genes that retain expression in cycling NBs  
221 (**Figure 2B**). A base by base Spearman's Rank correlation of ChIP-seq signal to

222 FACS proportional expression values of annotated loci across a 2.5 kb region either  
223 side of the TSS, shows a positive correlation between genes defined by high X1

224 proportional expression and the levels of H3K4me3 deposition close to the TSS  
225 (**Supplementary Figure 7A**). On the other hand, there is a negative correlation

226 between H3K4me3 deposition and genes with high Xins proportional expression  
227 across the same region. Thus, a high H3K4me3 ChIP-seq signal reflects higher

228 expression of a locus in X1 NBs, whereas lower H3K4me3 signal reflects lower X1  
229 NB gene expression but higher expression in the differentiated Xins compartment.

230

231 ChIP-seq plots of H3K36me3 split by FACS gene expression revealed, as predicted,  
232 a higher average peak around X1 enriched genes when compared with the X2 and

233 Xins FACS enrichment categories (**Figure 2C**). Importantly, the average peak for X1

234 genes is located towards the 3' end of genes, whereas the smaller Xins peak is  
235 promoter-proximal by comparison. This can be explained by a higher level of  
236 transcriptional elongation of X1 transcripts in NBs compared with Xins genes that  
237 have a predominant expression in the differentiated compartment. When splitting X2  
238 enriched genes by rank order, we observe that genes with highest expression in the  
239 X2 compartment and, as a consequence lowest transcript abundance in NBs, have  
240 an enrichment for H3K36me3 at the promoter-proximal end of the gene (**Figure 2D**).  
241 Conversely, with decreasing X2 proportional expression and a concomitant increase  
242 in transcriptional activity in the NB compartment, the average peak of H3K36me3 is  
243 shifted downstream of the TSS towards the 3' ends of genes.

244

245 We also looked at the individual H3K4me3 and H3K36me3 profiles of genes known  
246 to be highly expressed in NBs, and compared this to the signal for the suppressive  
247 marks H3K4me1 and H3K27me3 (see later). We confirmed that known metazoan  
248 genes associated with stem cell maintenance, such as cell-cycle and replication  
249 related genes (i.e. *mcm2*, *cyclin-B1*, *wee1*, *ctd1*), RNA-binding proteins (*piwi-1*,  
250 *ddx52*), DNA-damage response (DDR) genes (*errc6-like*, *exonuclease 1*) and  
251 epigenetic-related genes (*setd8-1*), all have high levels of H3K4me3 at the promoter-  
252 proximal end and H3K36me3 in the gene body, but a comparatively low signal for  
253 the suppressive marks H3K4me1 and H3K27me3 (**Figure 2E**).

254

255 **Levels of repressive histone marks H3K27me3 and H3K4me1 at TSSs in NBs**  
256 **correlate with gene expression**

257

258 Utilising our optimized ChIP-seq protocol, we investigated the occurrence of two  
259 additional histone modifications: H3K27me3, a repressive promoter mark catalysed  
260 by the PRC2 complex, and H3K4me1, a mark mediated by the MLL3/4 family of  
261 histone methyltransferases that correlates both with active enhancers and inactive  
262 promoter regions (Cheng et al. 2014; Calo and Wysocka 2013).

263

264 Genes that are categorized as being X1 enriched have low levels of H3K27me3  
265 deposition at the TSS, compared with Xins enriched genes which are silenced in  
266 NBs (**Figure 3A**). A positive correlation is observed between the level of H3K27me3  
267 and expression in the Xins compartment in a window from the TSS to 1kb  
268 downstream. This fairly broad domain of H3K27me3 deposition is consistent with  
269 previous studies in mammals (**Supplementary Figure 7b**) (Hawkins et al. 2011;  
270 Pauler et al. 2009). Conversely, a negative correlation at the TSS is observed  
271 between H3K27me3 signal and genes with high X1 expression (**Supplementary**  
272 **Figure 7b**). Consequently, the genome wide pattern for H3K27me3 is the opposite to  
273 that observed for H3K4me3. When splitting X2 genes by rank we note that genes  
274 with higher transcriptional enrichment in the post-mitotic compartment have a higher  
275 overall level of H3K27me3 at the promoter proximal region compared to genes that  
276 have NB expression (**Figure 3B**).

277

278 The distribution of the H3K4me1 mark is noticeably different compared to that  
279 observed for either H3K27me3 or H3K4me3. Specifically, Xins loci have high levels  
280 of H3K4me1 at the TSS in X1 NBs, consistent with these genes being expressed at  
281 low levels in NBs, whereas X1 loci have H3K4me1 peaks that are on average -1kb  
282 downstream of the TSS (**Figure 3C**). This data suggests that the H3K4me1 signal

283 shifts away from the TSS for genes that are actively expressed in NBs, in agreement  
284 with previous observations in mammals (Cheng et al, 2014). Further evidence of this  
285 peak shifting comes from analysis of X2 enriched genes sorted by rank order of  
286 expression (**Figure 3D**). Highly ranked X2 genes are marked with H3K4me1 at the  
287 promoter-proximal region. As the proportion of X2 enrichment decreases, indicative  
288 of increasing expression the G1 NB compartment, the average H3K4me1 profile  
289 becomes bimodal, eventually shifting downstream of the TSS (**Figure 3D**).

290

291 We plotted the epigenetic profiles of individual genes known to have high Xins  
292 proportional expressions and that have validated expression patterns both by single-  
293 cell RNA sequencing data and *in situ* hybridisations (**Figure 3E**) (Fincher et al. 2018;  
294 Plass et al. 2018). For example, these genes are expressed almost exclusively in the  
295 muscle (*COL21A1*, *slit1*), parenchyma (*glipr1*, *tolloid-like 1*), cathepsin+ cells (*dd961*,  
296 *aquaporin 1*), non-ciliated neurons (*tph*, *dd8060*), and protonephridia (*Na/Ca*  
297 *exchanger-like*), all have high H3K27me3 signal at the TSS consistent with these  
298 genes being silenced in NBs. Moreover, these Xins enriched genes all have a high  
299 H3K4me1 signal at the TSS that anti-correlates with H3K4me3 deposition, in support  
300 of an earlier hypothesis that H3K4me1 limits the role of H3K4me3 interacting  
301 proteins (Cheng et al. 2014). We also observe an atypical placement of H3K36me3  
302 at the TSS of individual Xins genes which supports the previous suggestion that that  
303 H3K36me3 may silence genic loci when placed at a promoter-proximal region of a  
304 gene (Wu et al. 2011).

305

306 **Correlations of H3K7me3 and H3K4me3 profiles against FACS proportions**  
307 **provide evidence for promoter bivalency in NBs**

308

309 Having demonstrated that known active and suppressive marks correlate with gene  
310 expression in planarian NBs, we investigated whether promoter bivalency could act  
311 to keep genes in a poised state prior to the onset of differentiation. Bivalent  
312 promoters are characterized by the presence of both the activating mark H3K4me3  
313 and repressive mark H3K27me3. The simultaneous presence of both these marks  
314 keeps the gene in a poised transcriptional state, with low or no expression, and upon  
315 differentiation resolves such that only one of the two marks is dominant. We  
316 reasoned that loci that are off or have relatively low proportional expression in X1  
317 NBs, but which are upregulated during the differentiation process in post-mitotic  
318 progeny (high X2 expression), would be good candidates for potential regulation by  
319 bivalent promoters in NBs. Additionally, in the absence of sequential or co-ChIP-seq  
320 technologies for planarians, using genes no or very low expression in NBs greatly  
321 reduces the likelihood that any bivalent signals are due to cell heterogeneity. This is  
322 because these genes would not be expected to have high levels of H3K4me3 in any  
323 (or at least very few cells) in the X1 NB compartment.

324

325 We plotted the percentage of maximum coverage for both H3K4me3 and H3K27me3  
326 for the top 1000 genes for each of the three FACS enrichment categories (**Figure**  
327 **4A-C**). A plot for the top 1000 X1 genes shows that these genes have a higher level  
328 of H3K4me3 compared to H3K27me3 (**Figure 4A**), whereas the top 1000 Xins  
329 genes have on average a much higher H3K27me3 signal compared to H3K4me3  
330 (**Figure 4C**). Consistent with our hypothesis, the top 1000 X2 genes, have peaks  
331 that are of similar magnitude for both of these functionally opposing epigenetic marks  
332 (**Figure 4B**).

333

334 We also plotted the epigenetic profiles of genes that are downregulated following  
335 RNAi of the planarian homolog of the RNA-binding protein MEX3 (Zhu et al. 2015).  
336 Previously, *mex3-1* has been shown to be necessary for generating the differentiated  
337 cells of multiple lineages, and consistent with a role in the differentiation process we  
338 found that the downregulated genes (downregulated 2-fold; p-value  $\leq 0.05$ ) had a  
339 higher average X2 proportional expression value (62.4%) compared with that of X1  
340 (12.5%) (**Supplementary File 2**). As expected, we note a paired H3K4me3 and  
341 H3K27me3 ChIP-seq signal for these *mex3-1* downregulated genes (**Figure 4D**).

342

343 One possibility is that that our observations are a result of genes with high X2  
344 expression only having the H3K4me3 mark only whilst other genes exist in a  
345 H3K27me3-only state in NBs. This would produce an average profile that appears  
346 bivalent when many genes are looked at simultaneously. To rule out this possibility,  
347 we plotted the distribution of Pearson correlation coefficients between H3K4me3 and  
348 H3K27me3 for the top 500 ranked X1, X2 and 285 *mex3-1(RNAi)* downregulated  
349 loci. This showed a strong positive correlation between H3K4me3 and H3K27me3  
350 for top 500 X2 loci and *mex3-1* downregulated loci, compared to a weak or no  
351 average correlation for X1 loci (**Figure 4E**). This is consistent with the interpretation  
352 that bivalency is present at promoters of genes that are highly enriched for  
353 expression in the X2 compartment.

354

355 **Planarian orthologs to mammalian bivalent genes are marked by H3K4me3,**  
356 **H3K27me3 and paused RNA Pol II at the promoter-proximal region**

357

358 RNA Polymerase II (RNAPII) pausing at genes that are highly inducible has been  
359 hypothesized to play a pivotal role in preparing genes for rapid induction in response  
360 to environmental or developmental stimuli. In a number of mammalian cellular  
361 contexts, bivalent genes have been shown to have a high density of paused RNA  
362 Pol II at the promoter-proximal region compared to genes which are actively  
363 transcribed, therefore allowing genes to be maintained in a transcriptionally poised  
364 state (Stock et al. 2007; Ferrai et al. 2017; Liu et al. 2017). Paused RNA Pol II can  
365 be distinguished from other forms by a phosphorylation at Ser5 (Ser5P) of the  
366 YSPTSPS heptad repeat at the C-terminus of the largest subunit of the Pol II  
367 complex. This heptad repeat is conserved across metazoans (Corden 2013), and is  
368 found in *S. mediterranea*.

369

370 CHIP-seq for RNAPII-Ser5P in NBs revealed that X2 enriched genes have a higher  
371 level of paused RNA Pol II at the promoter proximal region compared to X1 genes  
372 (**Figure 5A**). More significantly, highly ranked X2 genes with high expression in post-  
373 mitotic progeny and little expression in NBs have the highest amount of paused RNA  
374 Pol II close to the TSS, and with increasing expression in NBs the enrichment for  
375 this mark decreases (**Figure 5B**).

376

377 We calculated the pausing index (PI) for all annotated genes in our genome that  
378 have a total annotated length of  $\geq 1$  kb. For our particular genome annotation, we  
379 calculated the PI as the read coverage (normalized to input) +/- 500bp either side of  
380 the annotated TSS divided by the normalized read coverage from +500bp to  
381 +2500bp from the TSS (**Figure 5C**). We applied a conservative definition of a gene  
382 as being significantly stalled for transcription if the  $PI \geq 1$ . As expected, individual



383 genes highly expressed in the NB compartment had both a low PI and were not  
384 enriched for RNAPII-Ser5P at the promoter-proximal region, thereby confirming our  
385 methodology was accurate at the gene level (**Figure 5D**). We also found that X2  
386 genes with high PI scores had, on average, higher Pearson correlation coefficients  
387 between H3K4me3 and H3K27me3 (indicative of a bivalent state) compared with  
388 both X1 and X2 genes that have lower PI scores (**Supplementary Figure 8**). Given  
389 this correlation, we chose individual X2 enriched genes with high PI values and  
390 plotted the ChIP-seq profiles for H3K4me3, H3K27me3 and RNAPII-Ser5P as a  
391 percentage of maximum coverage for each mark.

392

393 Amongst genes enriched for these three signatures of bivalent promoters were those  
394 that have orthology to transcription factor (TF) families and include the Hox (*hoxb9*),  
395 Nkx (*nkx1.2*), Even-skipped (*evx-1*), Paired-like (*phox2A*) and T-box (*tbx2*) and Tlx  
396 (*tlx1-like*) gene classes (**Figure 5E**). Indeed, previous studies in both mouse ESCs  
397 (Bernstein et al. 2006) and quiescent muscle stem cells (Liu et al. 2013) have shown  
398 that members of these gene families are typically marked by both H3K4me3 and  
399 H3K27me3. A paired level of these marks at the TSS for these individual genes  
400 suggests the existence of bivalent chromatin states at these conserved  
401 developmental genes and confirms our correlational analysis of X2 loci (**Figure 4E**).  
402 Moreover, single-cell sequencing data and pseudotime analyses plots made from  
403 single cell data show that these genes are expressed at detectable levels in very  
404 few, if any, *smedwi-1+* cells (the archetypal NB marker) and are instead enriched in  
405 post-mitotic cells of specific lineages (**Supplementary Figure 9**) (Fincher et al.  
406 2018; Plass et al. 2018).

407

408 One caveat of our analyses is that the bivalent profiles of X2 enriched differentiation  
409 related genes may, for some individual genes that appear bivalent, reflect admixture  
410 of transcriptionally active and repressed states within the X1 NB compartment. For  
411 example, previous work has shown that the X1 compartment is highly  
412 heterogeneous with subsets of *piwi-1+* NBs expressing lineage specific TFs (Van  
413 Wolfswinkel et al. 2014). These genes, such as *SoxP-3* and *egr-1*, which are in fact  
414 X2 enriched according to our dataset and others (Labbé et al. 2012), appear to have  
415 a paired H3K4me3 and H3K27me3 signal (**Figure 5E**). Given that they are known to  
416 be expressed in a subset of cells in the X1 compartment and are definitive markers  
417 of lineage-primed NB subsets that will go through one more cell division (as  
418 validated by *in situ* hybridisation, condensin knockdown studies (Van Wolfswinkel et  
419 al. 2014; Lai et al. 2018) and single-cell RNA-seq data (Wurtzel et al. 2015; Plass et  
420 al. 2018; Fincher et al. 2018) no definitive conclusions concerning bivalency of these  
421 particular genes can be reached.

422

## 423 **Discussion**

424

425 In this study, we have produced a *Schmidtea mediterranea* asexual genome  
426 annotation based on gene expression, and integrated FACS RNA-seq datasets from  
427 different laboratories to calculate consensus proportional expression values for each  
428 annotated locus in the X1, X2 and Xins cellular compartments. We have developed  
429 an optimized ChIP-seq protocol, and employed this to generate robust genome-wide  
430 profiles of the active H3K4me3 and H3K36me3 marks and repressive H3K4me1 and  
431 H3K27me3 marks in planarian NBs.

432

433 We find that the active marks H3K4me3 and H3K36me3, and suppressive H3K4me1  
434 and H3K27me3 marks in X1 NBs correlate with the proportion of total transcript  
435 expression of these loci in X1 cells, validating our NB ChIP-seq methodology. These  
436 analyses showed that genes associated with stem cell differentiation, and which are  
437 expressed at low levels in X1 population but activated at high levels in the X2  
438 population, are marked with both H3K4me3 and H3K27me3 marks at comparable  
439 levels at the TSS. Moreover, these genes were also highly marked with paused RNA  
440 polymerase (RNAPII-Ser5P) at the promoter region consistent with the definition of  
441 transcriptionally poised bivalent genes. Although we cannot entirely rule out cell  
442 heterogeneity within the X1 NB population as a factor contributing to our observation  
443 of promoter bivalency, our focus on both genes with high X2 expression (post-mitotic  
444 NB progeny) and orthology to vertebrate transcription factors known to have bivalent  
445 profiles, provide strong evidence that bivalent histone marks may be involved in  
446 poising of genes for activation upon NB commitment and differentiation in planarians.

447

448 The existence of promoter bivalency in invertebrates, prior to our work here, has  
449 been contentious. For example, the mammalian orthologs of bivalent genes in  
450 *Drosophila* germ cells were found to have only repressive H3K27me3 deposited at  
451 their promoters (Schuettengruber et al. 2009; Gan et al. 2010; Lesch et al. 2016).  
452 However, in a more recent study using fly embryos, the Pc-repressive complex 1  
453 (PRC1) that binds to H3K27me3 was shown to co-purify with both the Fsh1 (ortholog  
454 of mammalian BRD4) that binds to acetylated histone marks and to Enok/Br140  
455 (orthologs to subunits of mammalian MAZ/MORF histone acetyltransferase  
456 complex). ChIP-seq identified two groups of PRC1/Br140 genomic binding sites that  
457 were either defined by strong H3K27me3 signal or strong H3K27ac signal (i.e.

458 actively transcribed genes). Both groups were also marked with narrow peaks of  
459 H3K4me3 at the TSS (Kang et al. 2017). These recent findings also argue for the  
460 existence of bivalent-like promoters outside of vertebrates, at least with respect to  
461 the binding of chromatin regulatory complexes, and extends the model to suggest  
462 that acetylation may be important in the resolution of bivalent protein complexes  
463 during development.

464

465 One key role of bivalency is thought to be to allow the maintenance of pluripotency in  
466 ESCs, by having genes involved in differentiation and commitment both silent but  
467 competent to switch on if the right signals are received. Our data suggest that this  
468 mechanism is likely to be important for pluripotency in planarian pluripotent NBs, as  
469 genes that can switch on rapidly upon differentiation appear to be the bivalent.  
470 Indeed, these genes also included planarian orthologs to mammalian TFs that have  
471 been documented to be bivalent in ESCs. Consequently, we are able to present a  
472 case for promoter bivalency in planarian NBs and in doing so demonstrate that this  
473 process is not necessarily vertebrate-specific. This novel finding adds to the growing  
474 body of evidence which suggests a deep conservation of regulatory mechanisms  
475 involved in stem cell function (Juliano et al. 2010; Alié et al. 2015; Solana 2013;  
476 Solana et al. 2016; Lai and Aboobaker 2018) as well as combinatorial patterns of  
477 post-translational modifications (Schwaiger et al. 2014; Sebé-Pedrós et al. 2016;  
478 Gaiti et al. 2017). Epigenetic studies in the unicellular relative of metazoans,  
479 *Capsaspora owczarzaki*, could not find any evidence of bivalency given the absence  
480 of H3K27me3, and epigenetic studies in the sponge *Amphimedon queenslandica*  
481 (Gaiti et al. 2017) and the cnidarian *Nematostella vectensis* (Schwaiger et al. 2014)

482 have also not revealed any evidence for this approach to gene regulation. Further  
483 work will be required to establish when bivalent chromatin evolved in animals.

484

485 Overall our development of a robust ChIP-seq protocol for use with planarian sorted  
486 NBs, together with good coverage for four definitive and essential epigenetic marks,  
487 establishes a resource for the future planarian studies investigating the epigenetic  
488 regulation of stem cell function.

489

## 490 **Materials and Methods**

491

### 492 **Reference assembly and annotations**

493 Previous transcriptome assemblies (Oxford (ox\_Smed\_v2), Dresden (dd\_smed\_v4),  
494 SmedGD Asexual, Smed GD Unigenes) were downloaded from and PlanMine  
495 (Brandl et al. 2016) and Smed GD 2.0 (Robb et al. 2008). NCBI complete CDS  
496 sequences for *Schmidtea mediterranea* were also downloaded. Sequences were  
497 aligned to the SmedGD Asexual 1.1 genome with GMAP (Wu and Watanabe 2005)  
498 and consolidated with PASA. An independent reference assembly was also  
499 performed by mapping 164 available RNA-seq datasets with HISAT2 (Sirén et al.  
500 2014) and assembly was performed with StringTie. The PASA consolidated and  
501 StringTie annotations were merged with StringTie.

502

503 An intron jaccard score (intersection of introns / union of introns) was calculated for  
504 all overlapping transcripts. Pair-wise jaccard similarity scores of 0.9 or greater were  
505 used to create a graph of similar annotations. From the resultant cliques of

506 transcripts, one was chosen to be the representative transcript for the locus, by  
507 prioritizing transcript length, ORF length, and BLAST homology.

508

509 Strand information for annotations was assigned by utilising in house strand-specific  
510 RNA-seq libraries, BLAST homology, and longest ORF length. Transdecoder was  
511 run utilizing PFAM and UNIPROT evidence to identify protein-coding transcripts in  
512 the annotations. Detail methods are recorded in an IPython notebook  
513 **(Supplementary File 3)**.

514

515

#### 516 **FACS proportional expression value generation for annotated loci**

517 Kallisto (Bray et al. 2016) was used to pseudo-align RNA-seq libraries originating  
518 from four labs (Önal et al. 2012; Labbé et al. 2012; Van Wolfswinkel et al. 2014; Zhu  
519 et al. 2015; Duncan et al. 2015) **(Supplementary Figure 2)** to our expression-based  
520 annotation of the asexual *S.mediterranea* genome. This generated TPM values for  
521 each annotated locus. Sleuth was used to calculate a normalization factor for each  
522 library. For each locus, the TPM values of member transcripts (potential isoforms)  
523 were summed to generate a consensus TPM value and then normalized accordingly.  
524 Replicates within each lab dataset were then averaged.

525

526 Normalized TPM values for each lab dataset were converted to a proportional value  
527 as a representation of expression in FACS categories. We next calculated three sets  
528 of pairwise ratios (X1:X2, X1:Xins, X2:Xins) using these proportional values. Given  
529 two of the three ratios, a third ratio can be 'predicted'. Consequently, we calculated 3  
530 'observed' ratios and 3 'predicted ratios'. A good Spearman's rank correlation was

531 observed for the X2:Xins ratio and as such we kept these observed proportions, and  
532 calculated an inferred X1 proportion. Detailed methodology is documented in  
533 **Supplementary File 4** and full list of X1,X2, and Xins proportional values is available  
534 in **Supplementary File 5**.

535

### 536 **ChIP-seq protocol**

537 For each experimental replicate, 600'000-700'000 planarian X1 cells were isolated,  
538 (sufficient for ChIP-seq of 3 histone marks and an input control) by utilisation of a  
539 published FACS protocol (Romero et al. 2012). We dissociated cells from an equal  
540 number of head, pharyngeal, or tail pieces from 3-day regenerating planarians. For  
541 whole worm ChIP-seq, wild-type worms were starved for 2 weeks prior to  
542 dissociation.

543

544 Following FACS, cells were pelleted. The pellet was re-suspended in Nuclei  
545 Extraction Buffer (0.5% NP40,0.25% Triton X-100, 10mM Tris-Cl pH7.5, 3mM CaCl<sub>2</sub>,  
546 0.25mM Sucrose, 1mM DTT, phosphatase cocktail inhibitor 2, phosphatase cocktail  
547 inhibitor 3). A 3% *Drosophila* S2 cell spike-in was added at this point. This was  
548 followed by 1% formaldehyde fixation for 7mins, which was quenched with the  
549 addition of glycine to a final 125mM concentration. The nuclei pellet was re-  
550 suspended in SDS lysis buffer (1% SDS, 50mM Tris-Cl pH8.0, 10mM EDTA) and  
551 incubated on ice, followed by the addition of ChIP dilution buffer. Samples were  
552 sonicated and 1/10<sup>th</sup> volume of Triton X-100 was added to dilute SDS in the solution.  
553 Samples were pellet, and supernatant was collected that contained the sonicated  
554 chromatin. Test de-crosslinking was performed on 1/8<sup>th</sup> of the sonicated chromatin,  
555 and analysed using a TapeStation DNA HS tape to verify the DNA fragment range

556 was between 100-500bp. Commercial *Drosophila* S2 chromatin (Active Motif 53083)  
557 spike-in was added at this point (at 3% of the amount of amount of *S. mediterranea*  
558 prepared chromatin) if S2 cells had been added earlier before chromatin preparation.

559

560 Protein A-covered Dynabeads were used for immunoprecipitation (IP). 50µl of  
561 Dynabeads were incubated overnight at 4c with 7µg of antibody (H3K4me3 Abcam  
562 ab8580; H3K36me3 Abcam ab9050; H3K4me1 Abcam ab8895; H3K27me3 Abcam  
563 ab6002; RNAPII-Ser5P ab5131) diluted in 0.5% BSA/PBS. Following incubation,  
564 Dynabeads were washed with 0.5% BSA/PBS, and ¼ of the total isolated chromatin  
565 was added per IP. Following overnight incubation, washes were performed 6 times  
566 with RIPA buffer (50mM HEPES-KOH pH 8.0, 500mM LiCl, 1mM EDTA, 1% NP-40,  
567 0.7% DOC, protease inhibitors). Dynabeads were washed with TE buffer and re-  
568 suspended in Elution Buffer (50mM Tris-Cl pH 8.0, 10mM EDTA, 1% SDS). Protein  
569 was separated from Dynabeads by incubating for 15mins at 65c on a shaking  
570 heating block at 1400rpm. Eluates were de-crosslinked at 65c overnight. Input  
571 chromatin (1/8<sup>th</sup> of the total chromatin amount) was also de-crosslinked at this point.  
572 Following incubation, RNaseA (0.2µg) and Proteinase K (0.2µg) was added to each  
573 sample and incubated for 1hr. DNA was purified with phenol:chloroform extraction  
574 followed by ethanol precipitation. DNA is re-suspended in TE and quantified with  
575 Qubit dsDNA HS kit. NEB Ultra II kit was used for library preparation, and clean-up  
576 was performed with Agencourt Ampure XP beads. Samples were paired-end  
577 sequenced at a length of 75 nucleotides on the Illumina NextSeq.

578

579 **ChIP-seq analysis**



580 Reads were trimmed with Trimmomatic (Bolger et al. 2014) and aligned to a  
581 concatenated file containing both our annotated *Schmidtea mediterranea* genome as  
582 well as the *Drosophila melanogaster* release 6 reference genome (Hoskins et al.  
583 2015) using BWA mem 0.7.12 (Li and Durbin 2009). Only uniquely mapping reads  
584 were considered further. Paired reads that map to both species were also removed.  
585 Picard tools-1.115 was used to remove duplicate reads. Reads were separated into  
586 sets that mapped to *Drosophila* or *S. mediterranea* using custom python scripts  
587 (documented in IPython notebook in **Supplementary File 6**). The number of reads  
588 aligning to the *Drosophila* genome were calculated for use in normalization  
589 calculations. For each paired or single map read, coordinates representing 100bp at  
590 the centre of sequenced were parsed and written to a BED file.

591

592 The genomecov function was used in BEDTools 2.27.0 (Quinlan and Hall 2010) to  
593 generate coverage tracks in bedgraph format. The resultant bedgraph file was  
594 converted to bigwig format UCSC's bedgraphtoBigWig tool (Kent et al. 2010).  
595 Deeptools2's computeMatrix was used to extract coverage around 2.5kb or 5kb  
596 either side of the annotated TSS for each annotated locus in 50bp windows for each  
597 sample and corresponding input (Ramírez et al. 2016). A normalization factor was  
598 calculated using the number of mapped reads corresponding to the *Drosophila*  
599 spike-in to control for between IP technical variation (Orlando et al. 2014). A scaling  
600 factor for input ChIP-seq libraries was calculated using the deepTools2 python API  
601 that uses the SES method (Diaz et al. 2012). The mean normalized coverage was  
602 calculated for each sample and input. The normalized input coverage was subtracted  
603 from the normalized sample coverage to generate a final coverage track for  
604 downstream visualization and analyses. Individual gene profiles for given ChIP-seq

605 tracks could then be visualised and sequences for those genes plotted in this paper  
606 are given in **Supplementary File 7**.

607

608 To calculate the correlation of ChIP-seq signal coverage to proportional FACS  
609 expression, two vector values were calculated. The first vector was proportional  
610 FACS expression for all genomic loci. The second vector was ChIP-seq coverage at  
611 each 50bp position 2.5kb either side of the TSS. A Spearman's rank correlation was  
612 performed on both vectors yielding a correlation value for the assayed position. The  
613 correlation value for each non-overlapping 50bp window was then plotted on a  
614 graph.

615

616 For comparison of profiles between different epigenetic marks a percentage  
617 coverage was calculated for each mark. The maximum coverage was found across  
618 all 5kb or 10kb regions for all loci. Absolute normalized coverage for each 50bp  
619 window was then divided by the maximum coverage observed for that mark in the  
620 genome, resulting in a percentage coverage in each 50bp window for each mark.

621

622 For calculation of pausing index, we added normalized coverage to input 500bp  
623 either side of the annotated TSS for each gene and divided this value by the total  
624 coverage between 500bp and 2.5kb downstream of the TSS.

625 Detailed methods for ChIP-seq analysis are documented in **Supplementary File 6**.

626

627 **Data access:**

628 ChIP short read data have been deposited in the NCBI BioProject under the  
629 accession (BioProject; <https://www.ncbi.nlm.nih.gov/bioproject/>) numbers

630 PRJNA471851 and PRJNA338116. Annotations made on the *S. mediterranea*  
631 genome and used in this study are available as compressed GFF file  
632 **(Supplementary File 8)**

633

634 **Acknowledgements:**

635 This work was funded grants from th the MRC (MR/M000133/1) and BBSRC  
636 (BB/K007564/1) awarded to AA. AD is funded by a BBSRC studentship  
637 (BB/J014427/1).

638

639 **Author contributions:**

640 AAA originally conceived and designed the study, upon which AD innovated. AD,  
641 YM, and PA performed CHIP-seq experiments. SH, SS, and AL assisted with  
642 optimization of CHIP-seq and RNA-seq protocols. AD and DK performed  
643 bioinformatic analyses. AD, DK and AAA wrote, reviewed, and revised the  
644 manuscript.

645

646 **Figure legends**

647

648 **Figure 1: A.** Overview of methodology for annotating the *Schmidtea mediterranea*  
649 asexual genome based on expression. 164 RNA-seq datasets, 4 *de novo*  
650 transcriptome assemblies, NCBI complete CDS sequences, and Smed Unigenes  
651 were mapped to the SmedGD Asxl v1.1 genome. Reference assemblies were  
652 merged, cleaned to remove potential splice variant redundancies, and the best  
653 representative transcript for each genomic locus was chosen. Strand information  
654 was obtained by BLAST to Uniprot, prediction of longest ORF and data from strand-  
655 specific libraries. This process yielded a total set of 38,771 loci. **B.** Methodology for  
656 gating X1, X2, Xins cell populations based on nuclear to cytoplasmic ratio during  
657 Fluorescent Activated Cell Sorting (FACS). **C.** Diagram depicting how X1, X2, Xins  
658 FACS population gates relate to cell cycle and differentiation stage. **D.** Overview of  
659 methodology for categorization of annotated loci based on FACS RNA-seq datasets.  
660 FACS RNA-seq datasets were mapped to our annotated genome using Kallisto and  
661 normalized with Sleuth. Normalization was done individually for each of the lab's  
662 datasets. Normalized TPMs were converted to proportions between available FACS  
663 categories of each lab, and a final consensus X1:X2:Xins proportion was calculated.  
664 **E.** A table presenting number of loci in different FACS classification groups, as well  
665 as number of protein-coding genes in each group based on Transdecoder evidence.

666

667 **Figure 2:** Histone marks for actively transcribed genes in X1 NBs. **A.** Average  
668 H3K4me3 ChIP-seq coverage profiles across X1, X2 and Xins enriched loci in X1  
669 NBs across biological replicates following outlier removal. Y-axis represents the  
670 difference in coverage between sample and input. X-axis represents 2.5kb up- and

671 downstream of the TSS. H3K4me3 signal is highest around promoter-proximal  
672 region close to the TSS for X1 enriched loci in NBs consistent with the role of  
673 H3K4me3 in active transcription. **B.** H3K4me3 ChIP-seq profiles following outlier  
674 removal for X2 genes ranked from high to low X2 proportional expression. H3K4me3  
675 signal in NBs decreases with an increase in proportion of X2 expression, indicative  
676 of high-ranking X2 genes having a predominant role in post-mitotic progeny as  
677 opposed to NBs. **C.** Average H3K36me3 ChIP-seq profile across X1, X2 and Xins  
678 enriched loci in X1 NBs across biological replicates following outlier removal. Y-axis  
679 represents the difference in coverage between sample and input. X-axis represents  
680 2.5kb upstream and downstream of the TSS. Signal for H3K36me3 is promoter-  
681 proximal for Xins genes, whereas the magnitude of signal is greater and shifted 3' for  
682 X1 genes. **D.** H3K36me3 ChIP-seq profiles following outlier removal for X2 genes  
683 from high to low X2 proportional ranking. H3K36me3 signal in NBs shifts to the 3'  
684 end with a decrease in X2 proportion, consistent with these lowly-ranked genes  
685 having transcriptional activity in NBs. **E.** H3K4me3 and H3K36me3 (active marks)  
686 and H3K4me1 and H3K27me3 (suppressive marks) ChIP-seq profiles for highly-  
687 expressed X1 genes in NBs. Y-axis represents percentage coverage for each mark  
688 and allows for the 4 epigenetic marks to be directly compared. X-axis represents 1.0  
689 kb upstream and 2.5 kb downstream of the TSS. Pie Charts represent proportional  
690 expression for each gene in X1 (dark blue), X2 (light blue) and Xins (orange).

691

692 **Figure 3:** Histone marks for inactive genes in X1 NBs. **A.** Average H3K27me3 ChIP-  
693 seq profile across X1, X2 and Xins enriched loci in X1 NBs across 3 biological  
694 replicates following outlier removal. Y-axis represents the difference in coverage  
695 between sample and input. X-axis represents signal 2.5kb upstream and

696 downstream of the TSS. **B.** H3K27me3 ChIP-seq profiles following outlier removal  
697 for X2 genes from high to low X2 proportional ranking. H3K27me3 signal increases  
698 with an increase in proportion of X2 gene expression, indicative of these high-  
699 ranking X2 genes being transcriptionally silenced or lowly expressed in NBs. **C.**  
700 Average H3K4me1 ChIP-seq profiles following outlier removal across X1, X2 and  
701 Xins enriched loci in X1 NBs. Y-axis represents the absolute difference in coverage  
702 between sample and input. X-axis represents signal 2.5kb upstream and  
703 downstream of the TSS. **D.** H3K4me1 ChIP-seq profiles following outlier removal for  
704 X2 genes from high to low X2 proportional ranking. Highly ranked X2 genes have a  
705 H3K4me1 signal at the promoter-proximal region, and a decrease in X2 ranking  
706 coincides with a peak shift -1kb downstream of the TSS. **E.** H3K4me3, H3K36me3,  
707 H3K4me1 and H3K27me3 NB ChIP-seq profiles for highly-expressed Xins genes. The  
708 Y-axis scale represents percentage coverage for each mark. X-axis represents 1.0kb  
709 upstream and 2.5 kb downstream of the TSS. Pie Charts represent proportional  
710 expression for each gene in X1 (dark blue), X2 (light blue) and Xins (orange).

711

712

713 **Figure 4: A-E:** Average H3K4me3 and H3K27me3 ChIP-seq profiles in X1 NBs  
714 across 3 biological replicates. Y-axis is percentage coverage after normalization to  
715 input to allow both ChIP-seq profiles to be directly compared. Plots are shown for: **A.**  
716 Top 1000 ranked X1 genes by expression. **B.** Top 1000 ranked X2 genes. **C.** Top  
717 1000 ranked Xins genes. **D.** 285 *Smed-mex3-1* down-regulated loci with >2-fold  
718 change ( $p < 0.05$ ). **E.** A distribution of Pearson correlation values for top 500 X1, X2,  
719 and 285 =>2-fold downregulated *mex-3-1* downregulated loci. The Pearson  
720 Correlation coefficient was calculated between the H3K4me3 and H3K27me3 values

721 at each 50bp window starting from -1000bp downstream of the TSS and 1500bp  
722 upstream of the TSS.

723

724 **Figure 5: A.** Average paused RNAPII-Ser5P ChIP-seq profile across X1 and X2  
725 enriched loci in X1 NBs across biological replicates following outlier removal. Y-axis  
726 represents the difference in coverage between sample and input. X-axis represents  
727 signal 2.5 upstream and downstream of the TSS. **B.** RNAPII-Ser5P ChIP-seq  
728 profiles following outlier removal for X2 genes from high to low X2 proportional  
729 ranking. RNAPII-Ser5P signal increases with an increase in proportion of X2 gene  
730 expression, indicative of these high-ranking X2 genes being transcriptionally silenced  
731 but maintained in a permissive state for rapid induction. **C.** Calculation for Pausing  
732 Index (PI) of genes => 1kb. We divided normalized coverage between +/- 500bp  
733 TSS by normalized coverage +500bp to +2.5 kb. For genes under 2.5 kb, we  
734 inspected RNAPII-Ser5P profiles visually to confirm whether Pol II pausing was  
735 enriched at the promoter-proximal region. **D.** Individual profiles for H3K34me3 and  
736 H3K27me3 of highly enriched NB X1 genes. X1 genes have a high level of  
737 H3K4me3 and levels of H3K27me3 correspond to intron regions and are not  
738 enriched at the promoter-proximal region. RNAPII-Ser5P signal is not enriched at the  
739 promoter-proximal region compared with the gene body, and as a result PI <1. **E.**  
740 We selected highly enriched X2 genes with a PI => 1 that have both H3K4me3 and  
741 H3K27me3 enriched at the promoter-proximal region, together with an enrichment of  
742 RNAPII-Ser5P close to the TSS. Pie Charts represent proportional expression for  
743 each gene in X1 (dark blue), X2 (light blue) and Xins (orange).

744

745

746 References:

747

748 Aboobaker AA. 2011. Planarian stem cells: A simple paradigm for regeneration.

749 *Trends Cell Biol* **21**: 304–311.

750 Akkers RC, van Heeringen SJ, Jacobi UG, Janssen-Megens EM, François KJ,

751 Stunnenberg HG, Veenstra GJC. 2009. A Hierarchy of H3K4me3 and

752 H3K27me3 Acquisition in Spatial Gene Regulation in *Xenopus* Embryos. *Dev*

753 *Cell* **17**: 425–434.

754 Alié A, Hayashi T, Sugimura I, Manuel M, Sugano W, Mano A, Satoh N, Agata K,

755 Funayama N. 2015. The ancestral gene repertoire of animal stem cells. *Proc*

756 *Natl Acad Sci* 201514789.

757 Baguñá J, Romero R. 1981. Quantitative analysis of cell types during growth,

758 degrowth and regeneration in the planarians *Dugesia mediterranea* and *Dugesia*

759 *tigrina*. *Hydrobiologia* **84**: 181–194.

760 Bernstein BE, Mikkelsen TS, Xie X, Kamal M, Huebert DJ, Cuff J, Fry B, Meissner A,

761 Wernig M, Plath K, et al. 2006. A Bivalent Chromatin Structure Marks Key

762 Developmental Genes in Embryonic Stem Cells. *Cell* **125**: 315–326.

763 Bledau AS, Schmidt K, Neumann K, Hill U, Ciotta G, Gupta A, Torres DC, Fu J,

764 Kranz A, Stewart AF, et al. 2014. The H3K4 methyltransferase Setd1a is first

765 required at the epiblast stage, whereas Setd1b becomes essential after

766 gastrulation. *Development* **141**: 1022–1035.

767 Bolger AM, Lohse M, Usadel B. 2014. Trimmomatic: A flexible trimmer for Illumina

768 sequence data. *Bioinformatics* **30**: 2114–2120.

769 Brandl H, Moon HK, Vila-Farré M, Liu SY, Henry I, Rink JC. 2016. PlanMine - A

770 mineable resource of planarian biology and biodiversity. *Nucleic Acids Res* **44**:



- 771 D764–D773.
- 772 Bray NL, Pimentel H, Melsted P, Pachter L. 2016. Near-optimal probabilistic RNA-  
773 seq quantification. *Nat Biotechnol* **34**: 525–7.
- 774 Brookes E, De Santiago I, Hebenstreit D, Morris KJ, Carroll T, Xie SQ, Stock JK,  
775 Heidemann M, Eick D, Nozaki N, et al. 2012. Polycomb associates genome-  
776 wide with a specific RNA polymerase II variant, and regulates metabolic genes  
777 in ESCs. *Cell Stem Cell* **10**: 157–170.
- 778 Calo E, Wysocka J. 2013. Modification of Enhancer Chromatin: What, How, and  
779 Why? *Mol Cell* **49**: 825–837.
- 780 Cantarel BL, Korf I, Robb SMC, Parra G, Ross E, Moore B, Holt C, Alvarado AS,  
781 Yandell M. 2008. MAKER: An easy-to-use annotation pipeline designed for  
782 emerging model organism genomes. *Genome Res* **18**: 188–196.
- 783 Carrozza MJ, Li B, Florens L, Suganuma T, Swanson SK, Lee KK, Shia WJ,  
784 Anderson S, Yates J, Washburn MP, et al. 2005. Histone H3 methylation by  
785 Set2 directs deacetylation of coding regions by Rpd3S to suppress spurious  
786 intragenic transcription. *Cell* **123**: 581–592.
- 787 Cheng J, Blum R, Bowman C, Hu D, Shilatifard A, Shen S, Dynlacht BD. 2014. A  
788 role for H3K4 monomethylation in gene repression and partitioning of chromatin  
789 readers. *Mol Cell* **53**: 979–992.
- 790 Corden JL. 2013. RNA polymerase II C-terminal domain: Tethering transcription to  
791 transcript and template. *Chem Rev* **113**: 8423–8455.
- 792 Cui K, Zang C, Roh TY, Schones DE, Childs RW, Peng W, Zhao K. 2009. Chromatin  
793 Signatures in Multipotent Human Hematopoietic Stem Cells Indicate the Fate of  
794 Bivalent Genes during Differentiation. *Cell Stem Cell* **4**: 80–93.
- 795 Dattani A, Sridhar D, Aziz Aboobaker A. 2018. Planarian flatworms as a new model

796 system for understanding the epigenetic regulation of stem cell pluripotency and  
797 differentiation. *Semin Cell Dev Biol*.

798 Denissov S, Hofemeister H, Marks H, Kranz A, Ciotta G, Singh S, Anastassiadis K,  
799 Stunnenberg HG, Stewart AF. 2014. Mll2 is required for H3K4 trimethylation on  
800 bivalent promoters in embryonic stem cells, whereas Mll1 is redundant.  
801 *Development* **141**: 526–537.

802 Diaz A, Park K, Lim DA, Song JS. 2012. Normalization, bias correction, and peak  
803 calling for ChIP-seq. *Stat Appl Genet Mol Biol* **11**.

804 Duncan EM, Chitsazan AD, Seidel CW, Sánchez Alvarado A. 2015. Set1 and  
805 MLL1/2 Target Distinct Sets of Functionally Different Genomic Loci In Vivo. *Cell*  
806 *Rep* **13**: 2741–55.

807 Ferrai C, Torlai Triglia E, Risner-Janiczek JR, Rito T, Rackham OJ, de Santiago I,  
808 Kukalev A, Nicodemi M, Akalin A, Li M, et al. 2017. RNA polymerase II primes  
809 Polycomb-repressed developmental genes throughout terminal neuronal  
810 differentiation. *Mol Syst Biol* **13**: 946.

811 Fincher CT, Wurtzel O, de Hoog T, Kravarik KM, Reddien PW. 2018. Cell type  
812 transcriptome atlas for the planarian *Schmidtea mediterranea*. *Science* **360**:  
813 eaaq1736.

814 Gaiti F, Jindrich K, Fernandez-Valverde SL, Roper KE, Degnan BM, Tanurdžić M.  
815 2017. Landscape of histone modifications in a sponge reveals the origin of  
816 animal cis-regulatory complexity. *Elife* **6**.

817 Gan Q, Schones DE, Ho Eun S, Wei G, Cui K, Zhao K, Chen X. 2010. Monovalent  
818 and unpoised status of most genes in undifferentiated cell-enriched *Drosophila*  
819 testis. *Genome Biol* **11**: R42.

820 Harikumar A, Meshorer E. 2015. Chromatin remodeling and bivalent histone

- 821 modifications in embryonic stem cells. *EMBO Rep in press*: 1609–1619.
- 822 Hattori N, Niwa T, Kimura K, Helin K, Ushijima T. 2013. Visualization of multivalent  
823 histone modification in a single cell reveals highly concerted epigenetic changes  
824 on differentiation of embryonic stem cells. *Nucleic Acids Res* **41**: 7231–7239.
- 825 Hawkins RD, Hon GC, Yang C, Antosiewicz-Bourget JE, Lee LK, Ngo QM, Klugman  
826 S, Ching KA, Edsall LE, Ye Z, et al. 2011. Dynamic chromatin states in human  
827 ES cells reveal potential regulatory sequences and genes involved in  
828 pluripotency. *Cell Res* **21**: 1393–1409.
- 829 Hayashi T, Asami M, Higuchi S, Shibata N, Agata K. 2006. Isolation of planarian X-  
830 ray-sensitive stem cells by fluorescence-activated cell sorting. *Dev Growth Differ*  
831 **48**: 371–380.
- 832 Hoskins RA, Carlson JW, Wan KH, Park S, Mendez I, Galle SE, Booth BW, Pfeiffer  
833 BD, George RA, Svirskas R, et al. 2015. The Release 6 reference sequence of  
834 the *Drosophila melanogaster* genome. *Genome Res* **25**: 445–458.
- 835 Hu D, Garruss AS, Gao X, Morgan MA, Cook M, Smith ER, Shilatifard A. 2013. The  
836 Mll2 branch of the COMPASS family regulates bivalent promoters in mouse  
837 embryonic stem cells. *Nat Struct Mol Biol* **20**: 1093–1097.
- 838 Hubert A, Henderson JM, Ross KG, Cowles MW, Torres J, Zayas RM. 2013.  
839 Epigenetic regulation of planarian stem cells by the SET1/MLL family of histone  
840 methyltransferases. *Epigenetics* **8**: 79–91.
- 841 Jaber-Hijazi F, Lo PJKP, Mihaylova Y, Foster JM, Benner JS, Tejada Romero B,  
842 Chen C, Malla S, Solana J, Ruzov A, et al. 2013. Planarian MBD2/3 is required  
843 for adult stem cell pluripotency independently of DNA methylation. *Dev Biol* **384**:  
844 141–153.
- 845 Joshi AA, Struhl K. 2005. Eaf3 chromodomain interaction with methylated H3-K36

- 846 links histone deacetylation to pol II elongation. *Mol Cell* **20**: 971–978.
- 847 Juliano CE, Swartz SZ, Wessel GM. 2010. A conserved germline multipotency  
848 program. *Development* **137**: 4113–4126.
- 849 Kang H, Jung YL, McElroy KA, Zee BM, Wallace HA, Woolnough JL, Park PJ,  
850 Kuroda MI. 2017. Bivalent complexes of PRC1 with orthologs of BRD4 and  
851 MOZ/MORF target developmental genes in *Drosophila*. *Genes Dev*.
- 852 Kent WJ, Zweig AS, Barber G, Hinrichs AS, Karolchik D. 2010. BigWig and BigBed:  
853 Enabling browsing of large distributed datasets. *Bioinformatics* **26**: 2204–2207.
- 854 Labbé RM, Irimia M, Currie KW, Lin A, Zhu SJ, Brown DDR, Ross EJ, Voisin V,  
855 Bader GD, Blencowe BJ, et al. 2012. A Comparative transcriptomic analysis  
856 reveals conserved features of stem cell pluripotency in planarians and  
857 mammals. *Stem Cells* **30**: 1734–1745.
- 858 Lai AG, Aboobaker AA. 2018. EvoRegen in animals: Time to uncover deep  
859 conservation or convergence of adult stem cell evolution and regenerative  
860 processes. *Dev Biol* **433**: 118–131.
- 861 Lai AG, Kosaka N, Abnave P, Sahu S, Aboobaker AA. 2018. The abrogation of  
862 condensin function provides independent evidence for defining the self-renewing  
863 population of pluripotent stem cells. *Dev Biol* **433**: 218–226.
- 864 Lesch BJ, Dokshin GA, Young RA, McCarrey JR, Page DC. 2013. A set of genes  
865 critical to development is epigenetically poised in mouse germ cells from fetal  
866 stages through completion of meiosis. *Proc Natl Acad Sci* **110**: 16061–16066.
- 867 Lesch BJ, Page DC. 2014. Poised chromatin in the mammalian germ line.  
868 *Development* **141**: 3619–3626.
- 869 Lesch BJ, Silber SJ, McCarrey JR, Page DC. 2016. Parallel evolution of male  
870 germline epigenetic poising and somatic development in animals. *Nat Genet* **48**:

- 871 888–894.
- 872 Li H, Durbin R. 2009. Fast and accurate short read alignment with Burrows-Wheeler  
873 transform. *Bioinformatics* **25**: 1754–1760.
- 874 Li J, Moazed D, Gygi SP. 2002. Association of the histone methyltransferase Set2  
875 with RNA polymerase II plays a role in transcription elongation. *J Biol Chem*  
876 **277**: 49383–8.
- 877 Liu J, Wu X, Zhang H, Pfeifer GP, Lu Q. 2017. Dynamics of RNA Polymerase II  
878 Pausing and Bivalent Histone H3 Methylation during Neuronal Differentiation in  
879 Brain Development. *Cell Rep* **20**: 1307–1318.
- 880 Liu L, Cheung TH, Charville GW, Hurgu BMC, Leavitt T, Shih J, Brunet A, Rando TA.  
881 2013. Chromatin Modifications as Determinants of Muscle Stem Cell  
882 Quiescence and Chronological Aging. *Cell Rep* **4**: 189–204.
- 883 Mihaylova Y, Abnave P, Kao D, Hughes S, Lai A, Jaber-Hijazi F, Kosaka N,  
884 Aboobaker A. 2017. Conservation of epigenetic regulation by the MLL3/4  
885 tumour suppressor in planarian pluripotent stem cells. *Bioarxiv*.
- 886 Molinaro AM, Pearson BJ. 2016. In silico lineage tracing through single cell  
887 transcriptomics identifies a neural stem cell population in planarians. *Genome*  
888 *Biol* **17**: 87.
- 889 Önal P, Grün D, Adamidi C, Rybak A, Solana J, Mastrobuoni G, Wang Y, Rahn HP,  
890 Chen W, Kempa S, et al. 2012. Gene expression of pluripotency determinants is  
891 conserved between mammalian and planarian stem cells. *EMBO J* **31**: 2755–  
892 2769.
- 893 Orlando DA, Chen MW, Brown VE, Solanki S, Choi YJ, Olson ER, Fritz CC, Bradner  
894 JE, Guenther MG. 2014. Quantitative ChIP-Seq normalization reveals global  
895 modulation of the epigenome. *Cell Rep* **9**: 1163–1170.

- 896 Palakodeti D, Smielewska M, Lu Y-C, Yeo GW, Graveley BR. 2008. The PIWI  
897 proteins SMEDWI-2 and SMEDWI-3 are required for stem cell function and  
898 piRNA expression in planarians. *RNA* **14**: 1174–1186.
- 899 Pauler FM, Sloane MA, Huang R, Regha K, Koerner M V., Tamir I, Sommer A,  
900 Aszodi A, Jenuwein T, Barlow DP. 2009. H3K27me3 forms BLOCs over silent  
901 genes and intergenic regions and specifies a histone banding pattern on a  
902 mouse autosomal chromosome. *Genome Res* **19**: 221–233.
- 903 Plass M, Solana J, Wolf FA, Ayoub S, Misios A, Glažar P, Obermayer B, Theis FJ,  
904 Kocks C, Rajewsky N. 2018. Cell type atlas and lineage tree of a whole complex  
905 animal by single-cell transcriptomics. *Science* **360**: eaaq1723.
- 906 Quinlan AR, Hall IM. 2010. BEDTools: A flexible suite of utilities for comparing  
907 genomic features. *Bioinformatics* **26**: 841–842.
- 908 Ramírez F, Ryan DP, Grüning B, Bhardwaj V, Kilpert F, Richter AS, Heyne S,  
909 Dündar F, Manke T. 2016. deepTools2: a next generation web server for deep-  
910 sequencing data analysis. *Nucleic Acids Res* **44**: W160–W165.
- 911 Reddien PW, Oviedo NJ, Jennings JR, Jenkin JC, Sánchez Alvarado A. 2005.  
912 SMEDWI-2 is a PIWI-like protein that regulates planarian stem cells. *Science*  
913 **310**: 1327–30.
- 914 Rink JC. 2013. Stem cell systems and regeneration in planaria. *Dev Genes Evol*  
915 **223**: 67–84.
- 916 Robb SMC, Ross E, Alvarado AS. 2008. SmedGD: The Schmidtea mediterranea  
917 genome database. *Nucleic Acids Res* **36**.
- 918 Romero BT, Evans DJ, Aboobaker AA. 2012. FACS analysis of the planarian stem  
919 cell compartment as a tool to understand regenerative mechanisms. *Methods*  
920 *Mol Biol* **916**: 167–179.

- 921 Sachs M, Onodera C, Blaschke K, Ebata K, Song J, Ramalho-Santos M. 2013.  
922 Bivalent Chromatin Marks Developmental Regulatory Genes in the Mouse  
923 Embryonic Germline InVivo. *Cell Rep* **3**: 1777–1784.
- 924 Schuettengruber B, Ganapathi M, Leblanc B, Portoso M, Jaschek R, Tolhuis B, Van  
925 Lohuizen M, Tanay A, Cavalli G. 2009. Functional anatomy of polycomb and  
926 trithorax chromatin landscapes in Drosophila embryos. *PLoS Biol* **7**.
- 927 Schwaiger M, Schönauer A, Rendeiro AF, Pribitzer C, Schauer A, Gilles AF, Schinko  
928 JB, Renfer E, Fredman D, Technau U. 2014. Evolutionary conservation of the  
929 eumetazoan gene regulatory landscape. *Genome Res* **24**: 639–650.
- 930 Scimone ML, Kravarik KM, Lapan SW, Reddien PW. 2014. Neoblast specialization in  
931 regeneration of the planarian schmidtea mediterranea. *Stem Cell Reports* **3**:  
932 339–352.
- 933 Scimone ML, Meisel J, Reddien PW. 2010. The Mi-2-like Smed-CHD4 gene is  
934 required for stem cell differentiation in the planarian Schmidtea mediterranea.  
935 *Development* **137**: 1231–1241.
- 936 Sebé-Pedrós A, Ballaré C, Parra-Acero H, Chiva C, Tena JJ, Sabidó E, Gómez-  
937 Skarmeta JL, Di Croce L, Ruiz-Trillo I. 2016. The Dynamic Regulatory Genome  
938 of Capsaspora and the Origin of Animal Multicellularity. *Cell* **165**: 1224–1237.
- 939 Shibata N, Kashima M, Ishiko T, Nishimura O, Rouhana L, Misaki K, Yonemura S,  
940 Saito K, Siomi H, Siomi MC, et al. 2016. Inheritance of a Nuclear PIWI from  
941 Pluripotent Stem Cells by Somatic Descendants Ensures Differentiation by  
942 Silencing Transposons in Planarian. *Dev Cell* **37**: 226–237.
- 943 Sirén J, Välimäki N, Mäkinen V. 2014. HISAT2 - Fast and sensitive alignment  
944 against general human population. *IEEE/ACM Trans Comput Biol Bioinforma*  
945 **11**: 375–388.

- 946 Solana J. 2013. Closing the circle of germline and stem cells: the Primordial Stem  
947 Cell hypothesis. *Evodevo* **4**: 2.
- 948 Solana J, Irimia M, Ayoub S, Orejuela MR, Zywitza V, Jens M, Tapial J, Ray D,  
949 Morris Q, Hughes TR, et al. 2016. Conserved functional antagonism of CELF  
950 and MBNL proteins controls stem cell-specific alternative splicing in planarians.  
951 *Elife* **5**.
- 952 Solana J, Kao D, Mihaylova Y, Jaber-Hijazi F, Malla S, Wilson R, Aboobaker A.  
953 2012. Defining the molecular profile of planarian pluripotent stem cells using a  
954 combinatorial RNAseq, RNA interference and irradiation approach. *Genome Biol*  
955 **13**: R19.
- 956 Stock JK, Giadrossi S, Casanova M, Brookes E, Vidal M, Koseki H, Brockdorff N,  
957 Fisher AG, Pombo A. 2007. Ring1-mediated ubiquitination of H2A restrains  
958 poised RNA polymerase II at bivalent genes in mouse ES cells. *Nat Cell Biol* **9**:  
959 1428–1435.
- 960 Van Wolfswinkel JC, Wagner DE, Reddien PW. 2014. Single-cell analysis reveals  
961 functionally distinct classes within the planarian stem cell compartment. *Cell*  
962 *Stem Cell* **15**: 326–339.
- 963 Vásquez-Doorman C, Petersen CP. 2016. The NuRD complex component p66  
964 suppresses photoreceptor neuron regeneration in planarians. *Regen (Oxford,*  
965 *England)* **3**: 168–78.
- 966 Vastenhouw NL, Zhang Y, Woods IG, Imam F, Regev A, Liu XS, Rinn J, Schier AF.  
967 2010. Chromatin signature of embryonic pluripotency is established during  
968 genome activation. *Nature* **464**: 922–926.
- 969 Voigt P, Tee WW, Reinberg D. 2013. A double take on bivalent promoters. *Genes*  
970 *Dev* **27**: 1318–1338.



- 971 Wagner EJ, Carpenter PB. 2012. Understanding the language of Lys36 methylation  
972 at histone H3. *Nat Rev Mol Cell Biol* **13**: 115–126.
- 973 Wu SF, Zhang H, Cairns BR. 2011. Genes for embryo development are packaged in  
974 blocks of multivalent chromatin in zebrafish sperm. *Genome Res* **21**: 578–589.
- 975 Wu TD, Watanabe CK. 2005. GMAP: A genomic mapping and alignment program for  
976 mRNA and EST sequences. *Bioinformatics* **21**: 1859–1875.
- 977 Wurtzel O, Cote LE, Poirier A, Satija R, Regev A, Reddien PW. 2015. A Generic and  
978 Cell-Type-Specific Wound Response Precedes Regeneration in Planarians. *Dev*  
979 *Cell* **35**: 632–645.
- 980 Yamaguchi S, Hong K, Liu R, Inoue A, Shen L, Zhang K, Zhang Y. 2013. Dynamics  
981 of 5-methylcytosine and 5-hydroxymethylcytosine during germ cell  
982 reprogramming. *Cell Res* **23**: 329–339.
- 983 Zhu SJ, Hallows SE, Currie KW, Xu C, Pearson BJ. 2015. A mex3 homolog is  
984 required for differentiation during planarian stem cell lineage development. *Elife*  
985 **4**: 1–23.
- 986

## A Genome annotation of transcribed loci

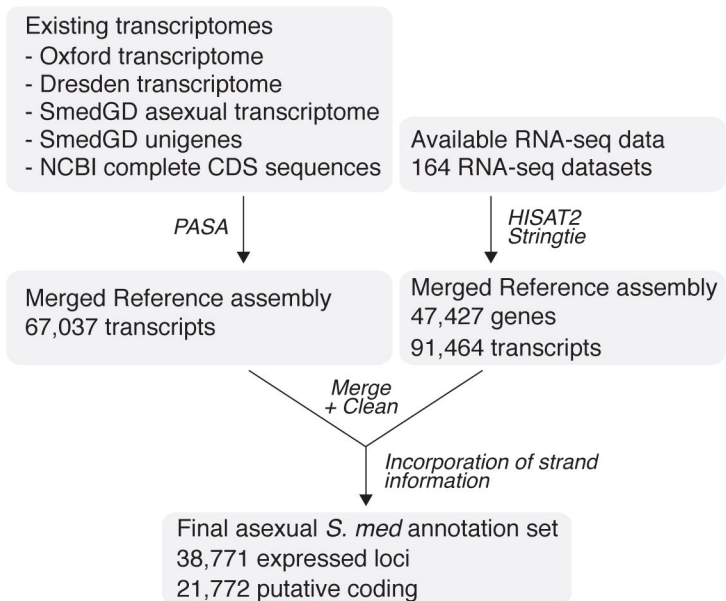

C

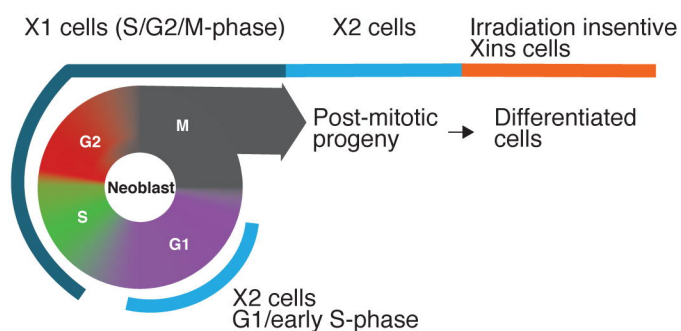

B

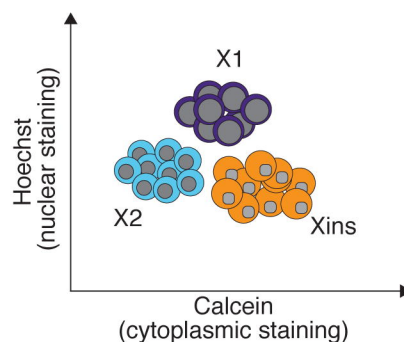

## D FACS categorization of annotated loci

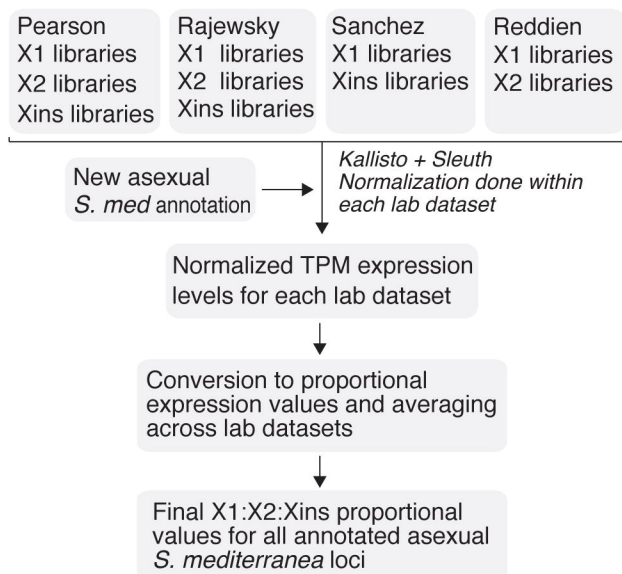

E

## FACS categorization of 38,711 total loci

| Category         | Criteria                                                                               | Loci   | Coding loci (% of category) |
|------------------|----------------------------------------------------------------------------------------|--------|-----------------------------|
| X1 enriched      | X1 proportional expression $\Rightarrow$ 50%                                           | 2,253  | 1,544 (68%)                 |
| X2 enriched      | X2 proportional expression $\Rightarrow$ 50%                                           | 8,444  | 4,781 (57%)                 |
| Xins enriched    | Xins proportional expression $\Rightarrow$ 50%                                         | 5,119  | 3,877 (76%)                 |
| X1/X2 enriched   | X1 + X2 proportional expression $\Rightarrow$ 75%<br>Neither enriched in X1 nor X2     | 4,538  | 3,107 (68%)                 |
| X2/Xins enriched | X2 + Xins proportional expression $\Rightarrow$ 75%<br>Neither enriched in X2 nor Xins | 3,652  | 2,688 (74%)                 |
| X1/Xins enriched | X1 + Xins proportional expression $\Rightarrow$ 75%<br>Neither enriched in X2 nor Xins | 303    | 0 (0%)                      |
| Ubiquitous       | Loci with roughly equal proportion in X1, X2, and Xins                                 | 2,897  | 2,003 (69%)                 |
| Unclassified     | Loci with $<10$ reads in all FACS RNA-seq libraries                                    | 11,565 | 3,762 (33%)                 |

### FACS enrichment group

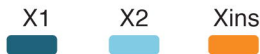

### X2 Rank Order

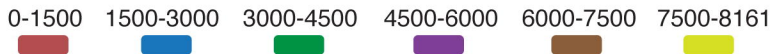

**A** H3K4me3 profile split by FACS enrichment groups

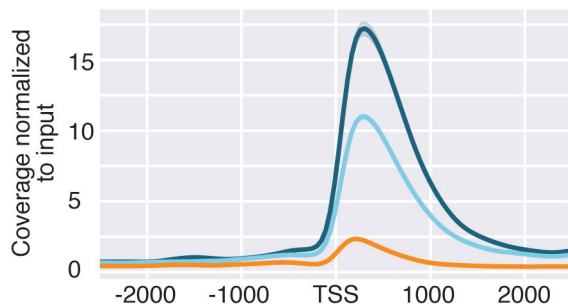

**B** H3K4me3 profile split by X2 rank order

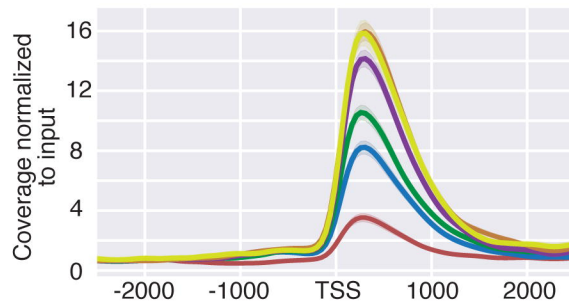

**C** H3K36me3 profile split by FACS enrichment groups

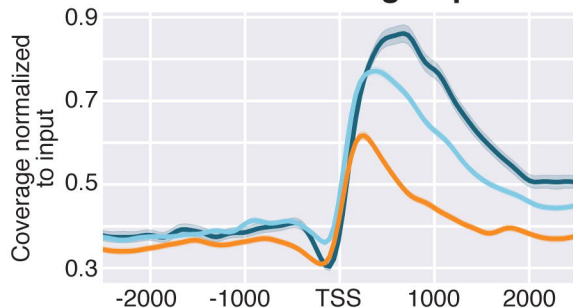

**D** H3K36me3 profile split by X2 rank order

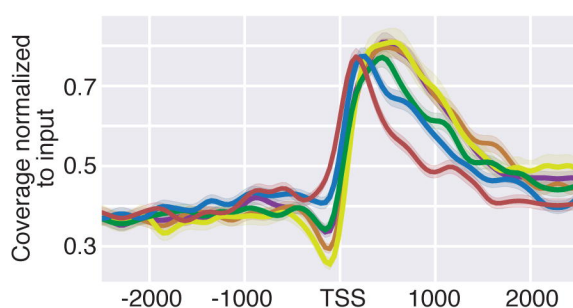

**E** Individual X1 gene profiles

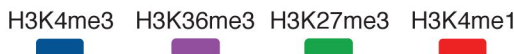

*mcm2* (asx1.1\_ox1.0.loc.08008)

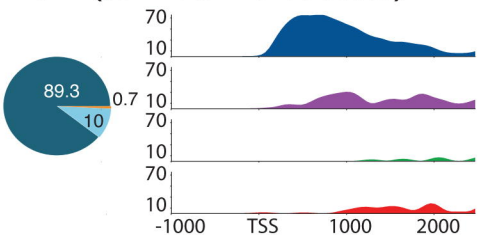

*wee1* (asx1.1\_ox1.0.loc.09127)

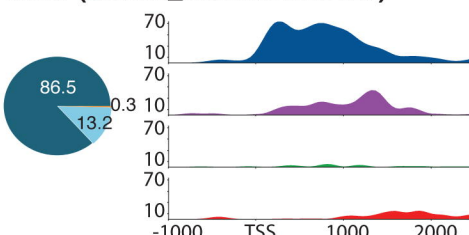

*piwi-1* (asx1.1\_ox1.0.loc.31395)

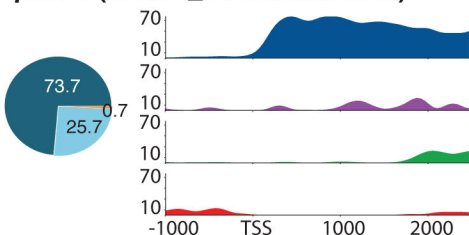

*errc6* (asx1.1\_ox1.0.loc.03346)

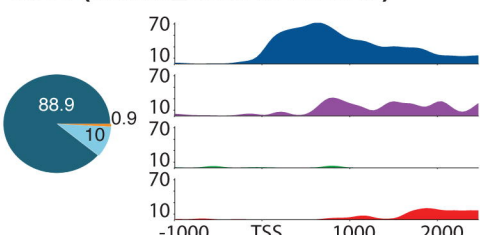

*ctd1* (asx1.1\_ox1.0.loc.00709)

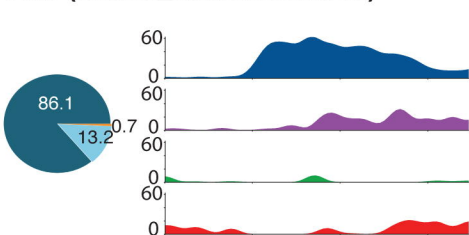

*setd8* (asx1.1\_ox1.0.loc.10088)

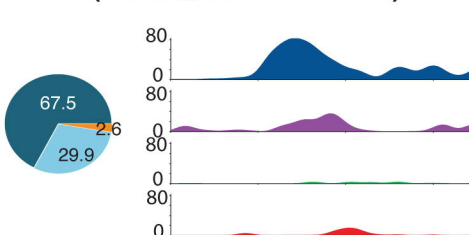

*exonuclease 1* (asx1.1\_ox1.0.loc.19362)

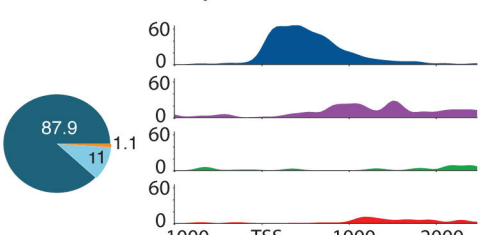

*cyclin-b1* (asx1.1\_ox1.0.loc.09397)

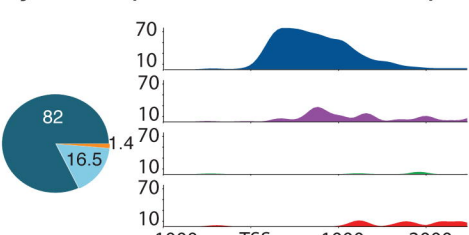

*ddx52* (asx1.1\_ox1.0.loc.01393)

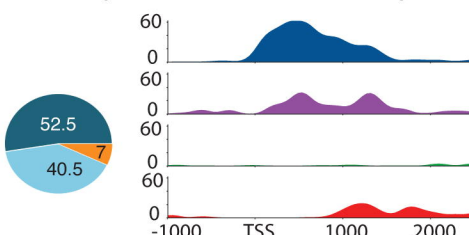

### FACS enrichment group

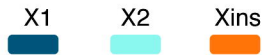

### X2 Rank Order

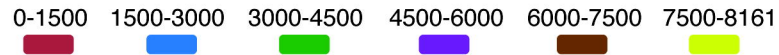

**A** H3K27me3 profile split by FACS enrichment groups

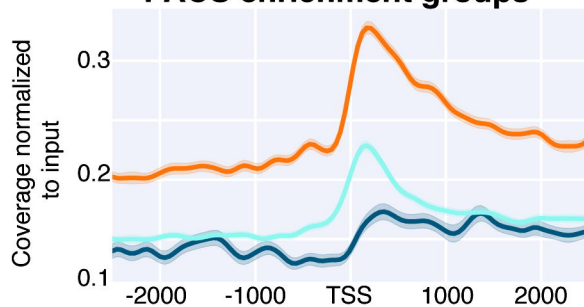

**B** H3K27me3 profile split by X2 rank order

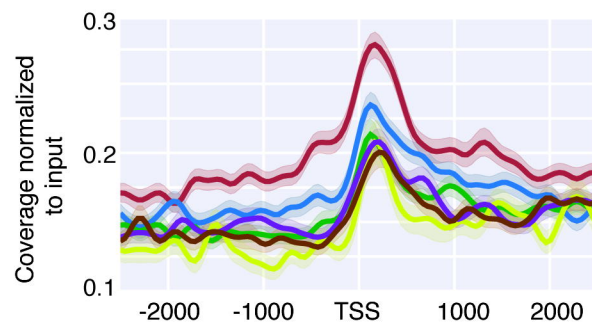

**C** H3K4me1 profile split by FACS enrichment groups

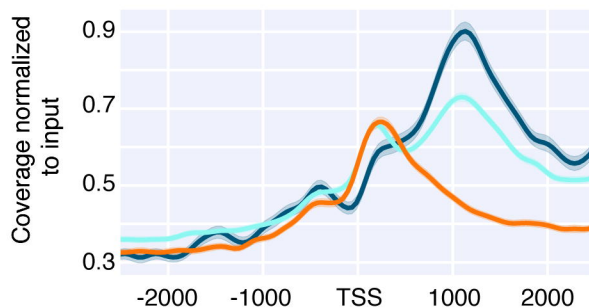

**D** H3K4me1 profile split by X2 rank order

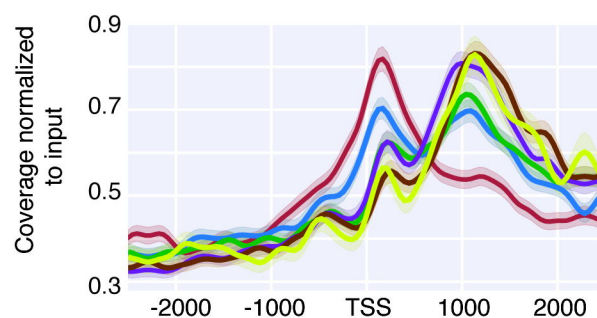

**E** Individual Xins gene profiles

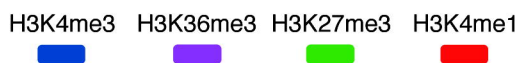

*tolloid-like 1* (asx1.1\_ox1.0.loc.16291)

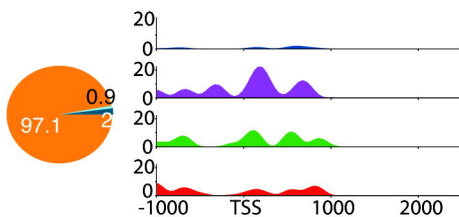

*slit* (asx1.1\_ox1.0.loc.32116)

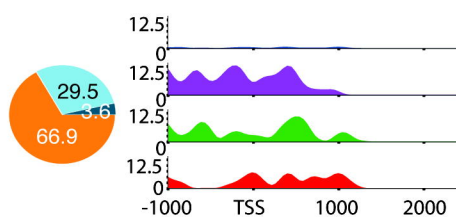

*netrin 2* (asx1.1\_ox1.0.loc.26786)

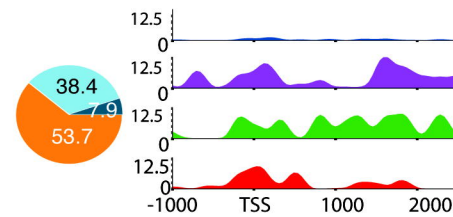

*collagen (COL21A1)* (asx1.1\_ox1.0.loc.08179)

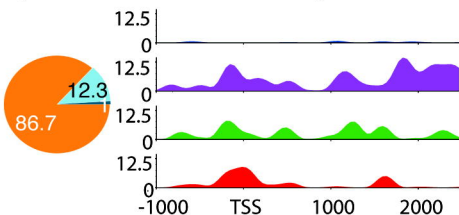

*dd\_9961* (asx1.1\_ox1.0.loc.17590)

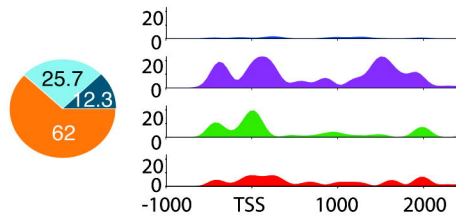

*aquaporin 4* (asx1.1\_ox1.0.loc.11384)

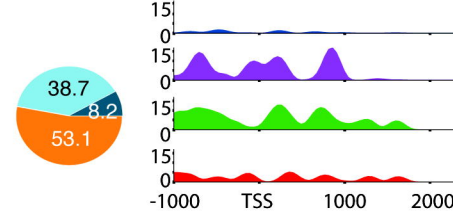

*tph* (asx1.1\_ox1.0.loc.14974)

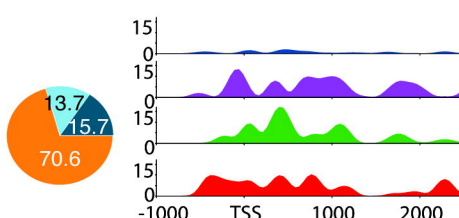

*Na/Ca exchanger like* (asx1.1\_ox1.0.loc.10799)

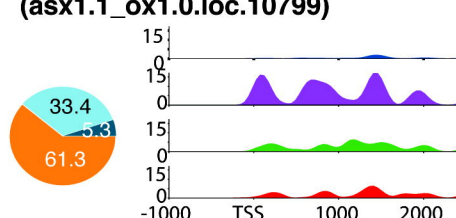

*dd\_8060* (asx1.1\_ox1.0.loc.26607)

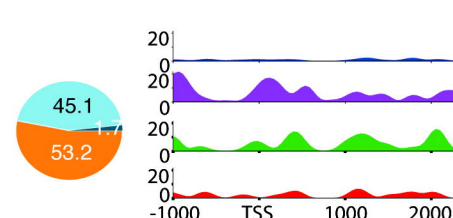

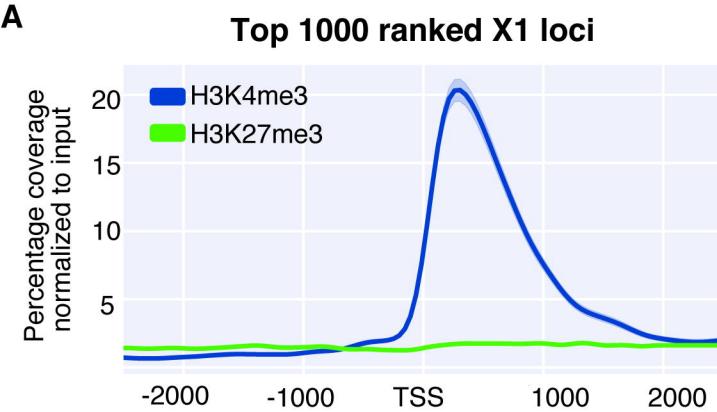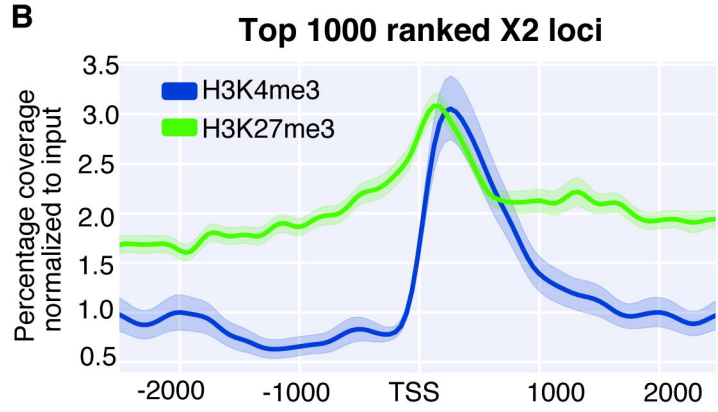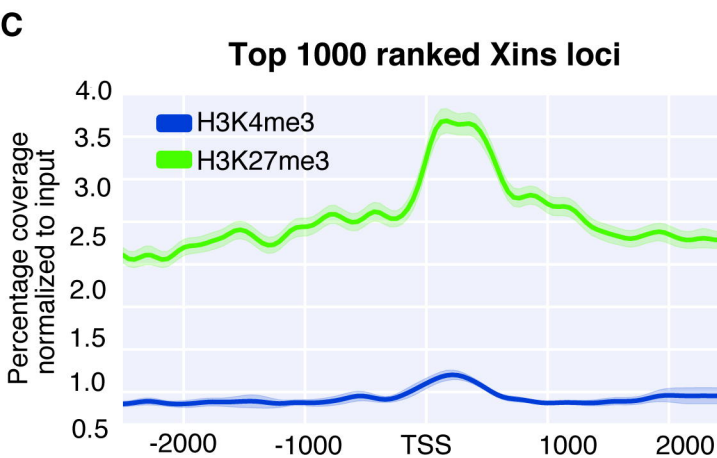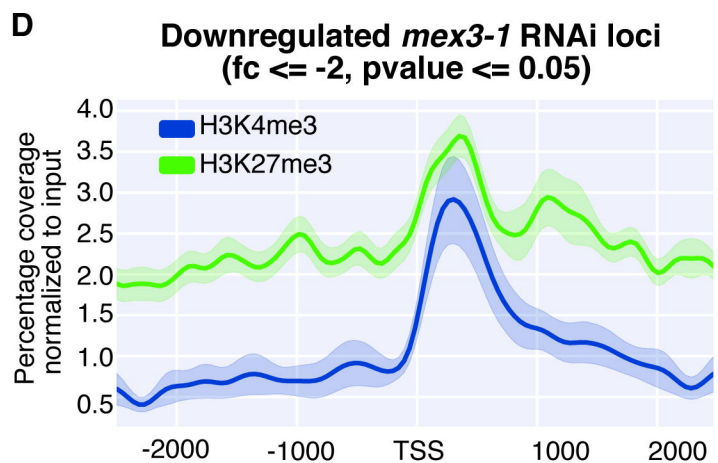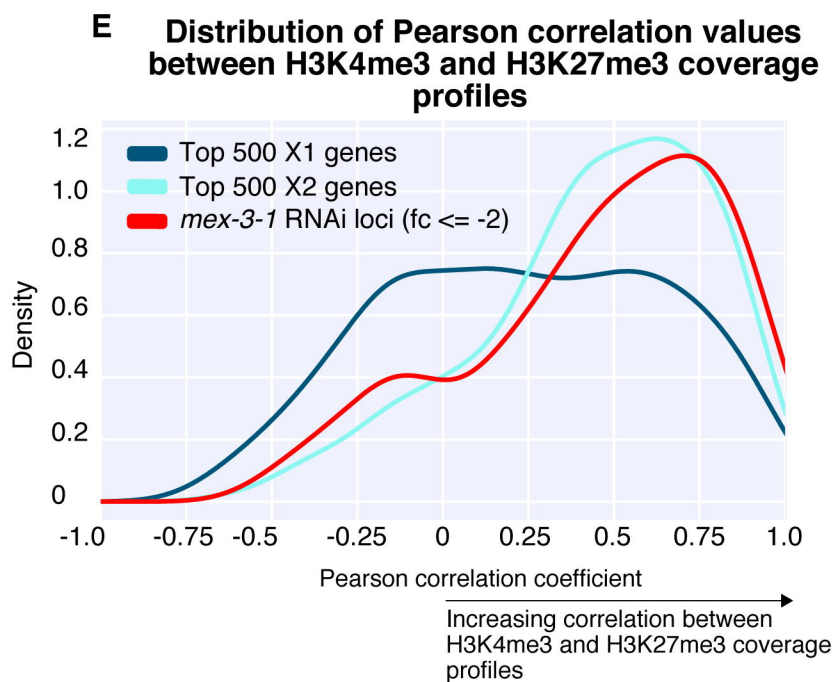

### FACS enrichment group

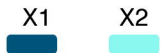

### X2 Rank Order

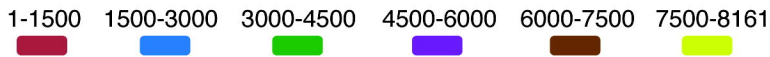

**A**

### Pol II (Ser5p) profile of X1 and X2 enriched genes

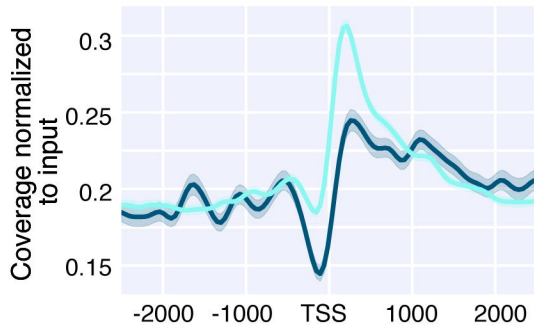

**B**

### Pol II (Ser5p) profile split by X2 rank order

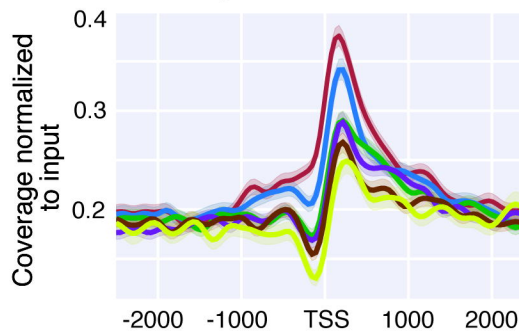

**C**

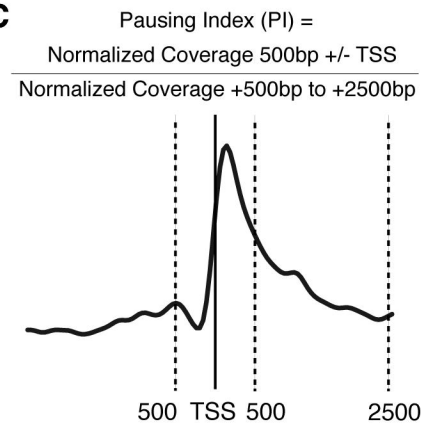

**D**

### Individual gene profiles

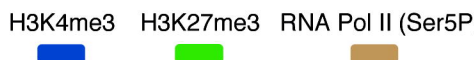

X1 enriched genes  
(low promoter pausing)

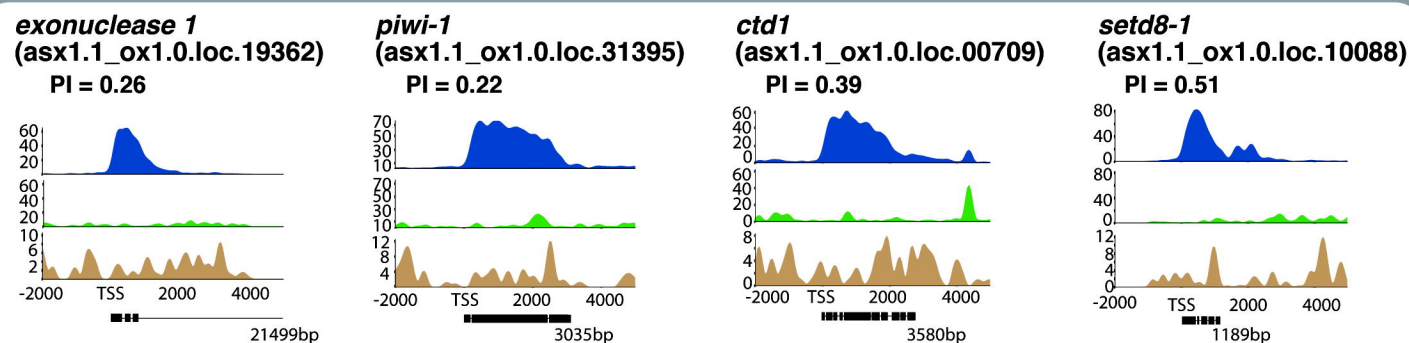

**E**

X2 enriched genes  
(high promoter pausing)

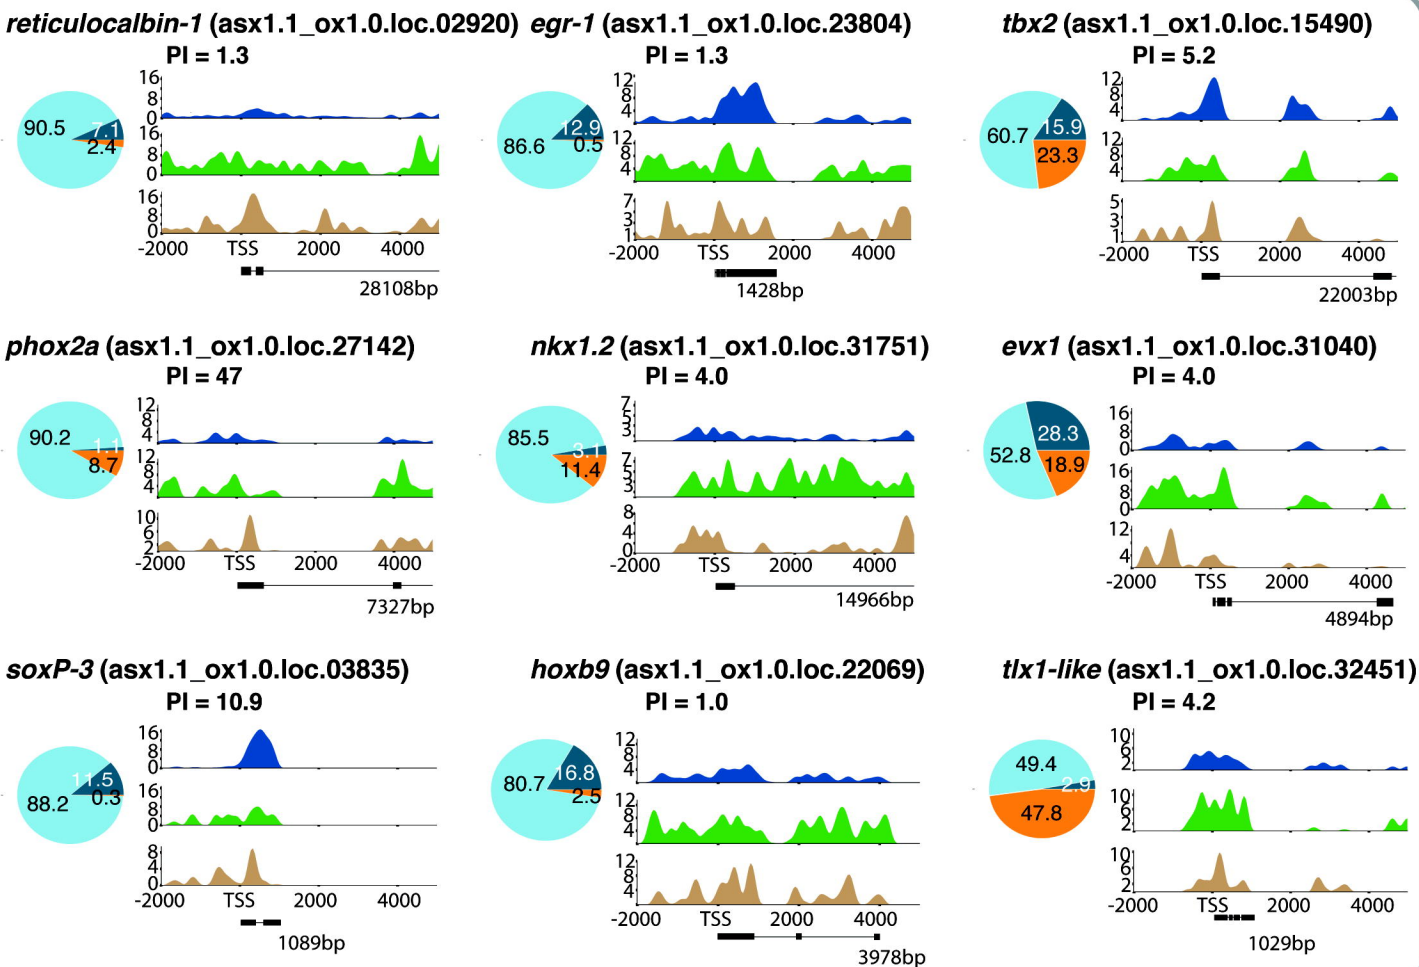

Source: https://www.biorxiv.org/content/10.1101/122135v2.full.pdf
